# Supplementary material for: Genomic Differentiation Between Temperate and Tropical Australian Populations ofDrosophila melanogaster
Source: Oxford University Press journal article supplement (doi:10.1534/genetics.110.123059), 2010-11-09
Supplement: 123059_si.pdf [file 123059_si.pdf]

# GENETICS

## Supporting Information

<http://www.genetics.org/cgi/content/full/genetics.110.123059/DC1>

### **Genomic Differentiation Between Temperate and Tropical Australian Populations of *Drosophila melanogaster***

**Bryan Kolaczkowski, Andrew D. Kern, Alisha K. Holloway and David J. Begun**

Copyright © 2011 by the Genetics Society of America  
DOI: 10.1534/genetics.110.123059

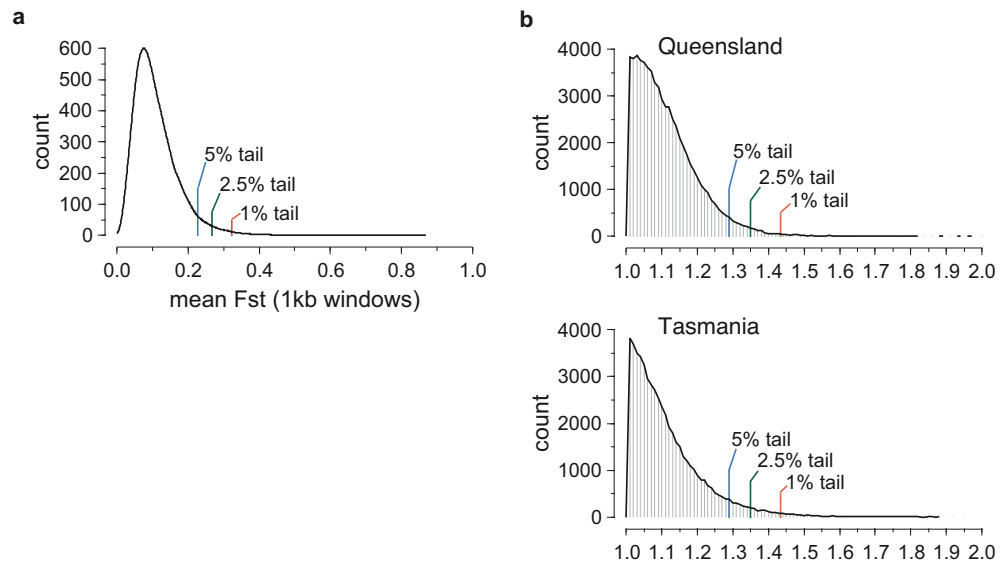

FIGURE S1.—Upper-tail  $F_{ST}$  and copy-number ratio cutoffs used in this study. We bin nonoverlapping 1kb genomic windows of  $F_{ST}$  (a) and copy-number ratio (b) and plot the number of windows in each bin. Tail cutoffs of 1, 2.5 and 5% are indicated in each panel.

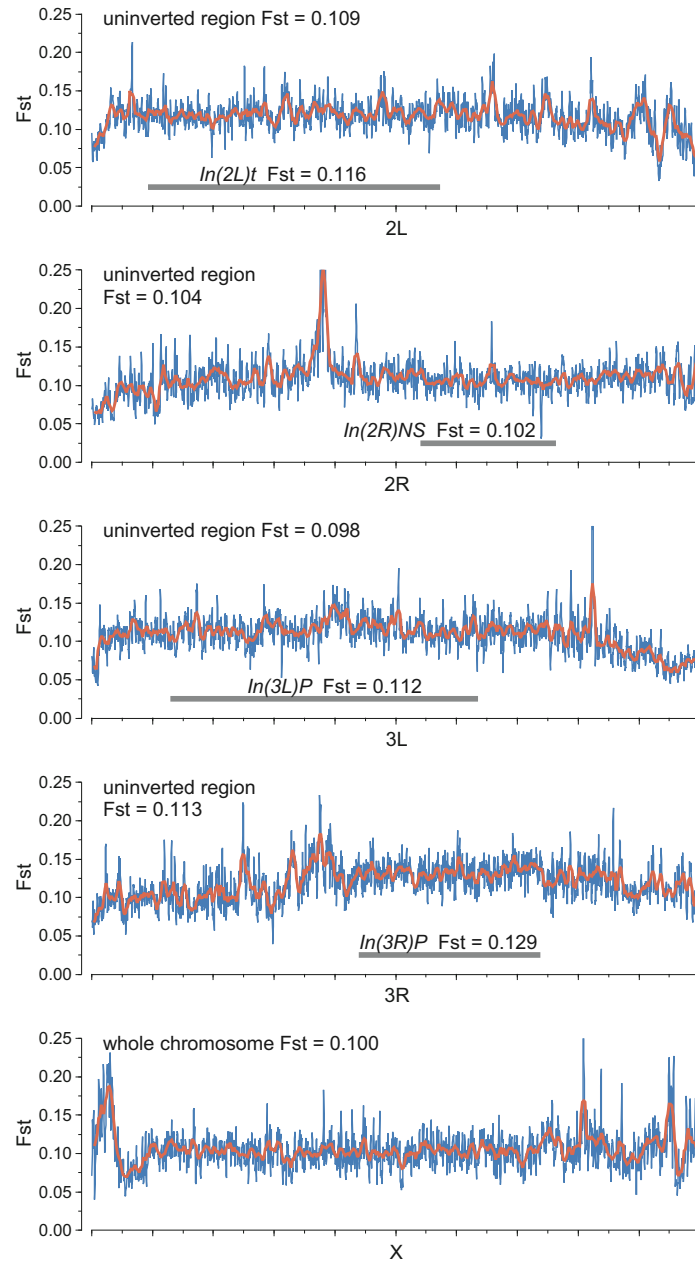

FIGURE S2.—We plot  $F_{ST}$  for standard and inverted regions of each chromosome arm. Inverted regions are indicated by gray horizontal lines. Blue series indicate average  $F_{ST}$  values over 25kb windows slid every 10kb; red lines show 200kb windows slid 50kb at a time. Overall  $F_{ST}$  across each region (standardvs. inverted) is also indicated in each panel. Note that there is no inversion on the X chromosome.

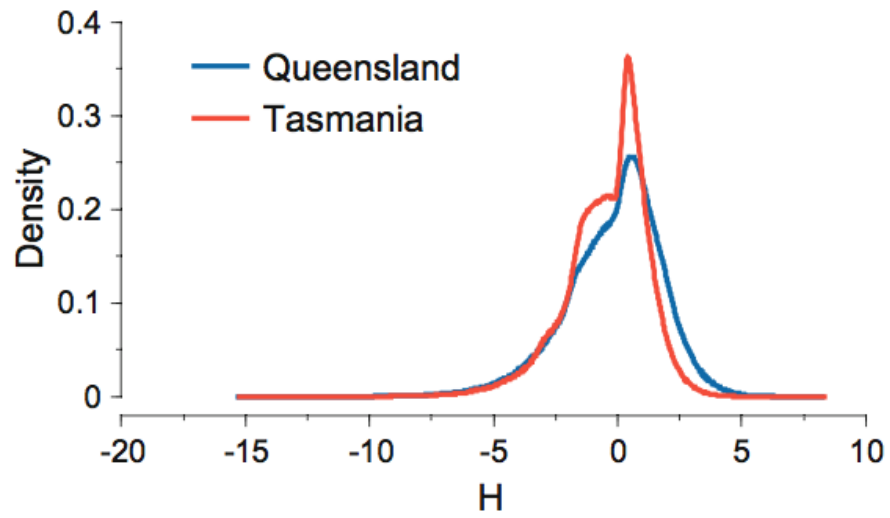

FIGURE S3.—A comparison of the distributions of H statistics computed in 1kb windows in both the Queensland and the Tasmanian samples. This is a modified version of Fay and Wu's H which excludes singleton variants. See main text for details. The medians of these distributions are significantly different from one another in a Wilcoxon rank sum test ( $p < 2.2 \times 10^{-16}$ ).

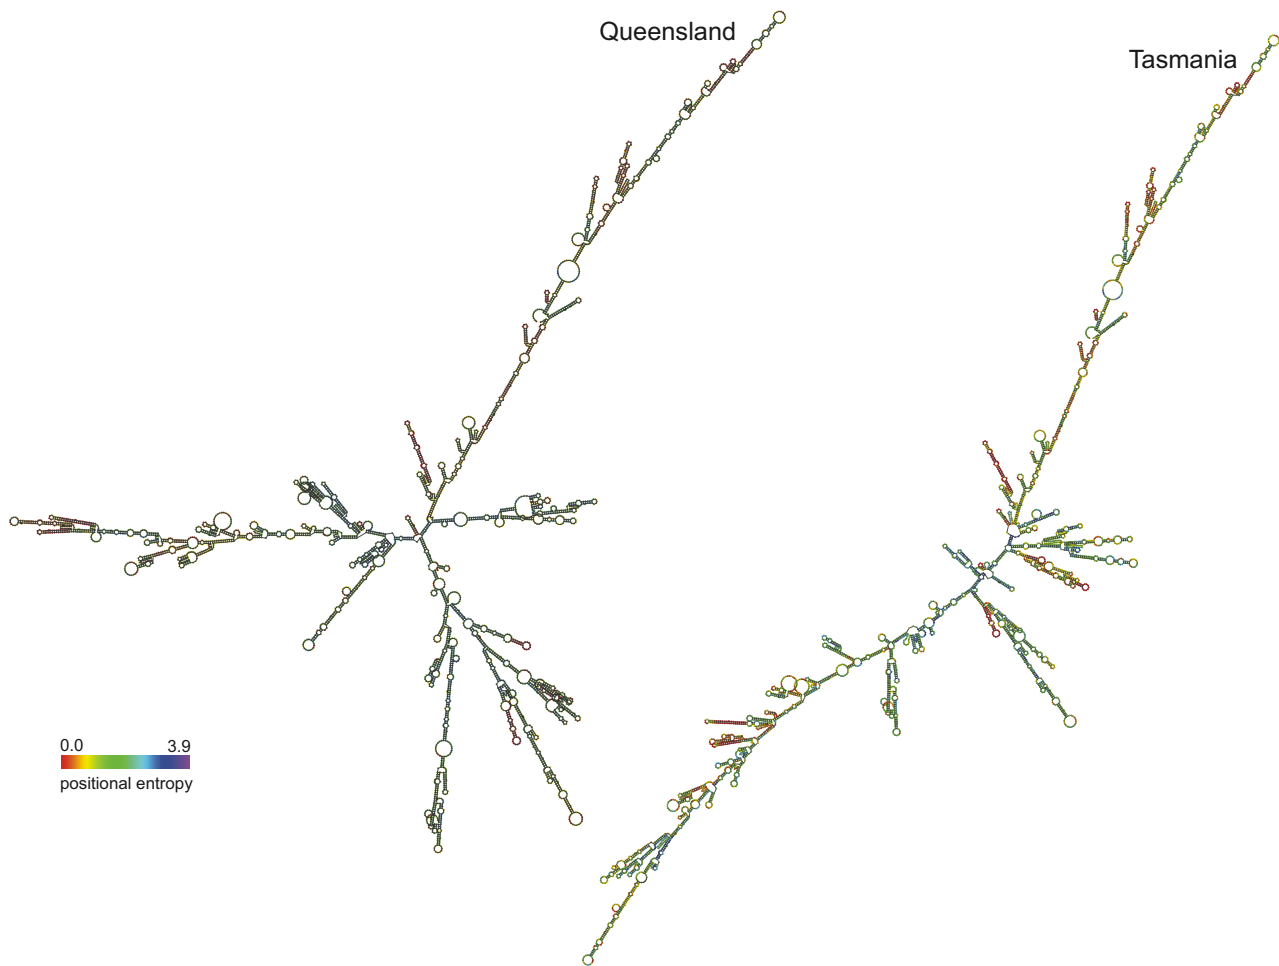

FIGURE S4.—Fixed differences between Queensland and Tasmania at the *Irc* gene radically alter pre-mRNA structure. Computationally-inferred secondary structure of *Irc* pre-mRNA is shown for Queensland and Tasmania alleles.

TABLE S1

We report average polymorphism per 1kb ( $\pi$ ) and Fay and Wu's  $H$  for each population, as well as mean  $F_{ST}$  and size of highly-differentiated genomic regions for the normally-recombining portion of each chromosome arm.

| chromosome | $\pi$      |          | Fay and Wu's $H$ |          | $F_{ST}$ | differentiated region size |
|------------|------------|----------|------------------|----------|----------|----------------------------|
|            | Queensland | Tasmania | Queensland       | Tasmania |          |                            |
| 2L         | 5.060      | 3.146    | -0.108           | -0.500   | 0.116    | 2206                       |
| 2R         | 4.905      | 3.284    | -0.272           | -0.428   | 0.107    | 2507                       |
| 3L         | 5.051      | 3.130    | -0.125           | -0.426   | 0.111    | 2013                       |
| 3R         | 5.010      | 3.117    | 0.043            | -0.442   | 0.124    | 3295                       |
| X          | 2.926      | 2.121    | -0.500           | -0.456   | 0.097    | 1899                       |

TABLE S2

Genes in the top 2.5% of 3'UTR differentiation.

| Gene ID     | 3'UTR $F_{ST}$ | Gene Name | Gene ID     | 3'UTR $F_{ST}$ | Gene Name |
|-------------|----------------|-----------|-------------|----------------|-----------|
| FBgn0038783 | 0.692282       | CG4367    | FBgn0035028 | 0.341374       | Start1    |
| FBgn0038827 | 0.66719        | Fancd2    | FBgn0259680 | 0.337828       | Pkcdelta  |
| FBgn0033809 | 0.620316       | CG4630    | FBgn0031681 | 0.337809       | pgant5    |
| FBgn0033808 | 0.620316       | CG4627    | FBgn0031861 | 0.335605       | CG17375   |
| FBgn0038225 | 0.596327       | soti      | FBgn0051320 | 0.334101       | CG31320   |
| FBgn0031491 | 0.561771       | alpha4GT1 | FBgn0038223 | 0.334016       | CG8538    |
| FBgn0038652 | 0.544105       | CG7720    | FBgn0259984 | 0.333621       | kuz       |
| FBgn0032974 | 0.532426       | CG3651    | FBgn0034820 | 0.331211       | CG13538   |
| FBgn0039396 | 0.523533       | CcapR     | FBgn0011289 | 0.327801       | TfIIA-L   |
| FBgn0038478 | 0.521974       | cal1      | FBgn0016054 | 0.32776        | phr6-4    |
| FBgn0038292 | 0.515821       | CG3987    | FBgn0024832 | 0.326232       | AP-50     |
| FBgn0032409 | 0.469866       | Ced-12    | FBgn0019968 | 0.32613        | Khc-73    |
| FBgn0032520 | 0.468198       | CG10859   | FBgn0031619 | 0.321426       | CG3355    |
| FBgn0032318 | 0.458057       | CG14072   | FBgn0085374 | 0.320338       | CG34345   |
| FBgn0010441 | 0.446403       | pll       | FBgn0032515 | 0.319843       | loqs      |
| FBgn0038124 | 0.436888       | CG14380   | FBgn0031752 | 0.317964       | CG9044    |
| FBgn0032465 | 0.430473       | CG12404   | FBgn0024432 | 0.317639       | Dlc90F    |
| FBgn0023415 | 0.426255       | Acp32CD   | FBgn0053092 | 0.317186       | CG33092   |
| FBgn0031284 | 0.424294       | CG3876    | FBgn0029161 | 0.316588       | slmo      |
| FBgn0039049 | 0.421011       | CG6726    | FBgn0085208 | 0.316588       | CG34179   |
| FBgn0020368 | 0.419943       | Vha68-1   | FBgn0035370 | 0.315363       | CG1240    |
| FBgn0043471 | 0.418173       | kappaTry  | FBgn0033128 | 0.315135       | Tsp42Eg   |
| FBgn0004888 | 0.41782        | Scsalpha  | FBgn0046776 | 0.31513        | CG14033   |
| FBgn0042710 | 0.414471       | Hex-t2    | FBgn0050050 | 0.314525       | CG30050   |
| FBgn0010222 | 0.399271       | Nmdmc     | FBgn0011244 | 0.313799       | Hsp60B    |
| FBgn0024947 | 0.395613       | NTPase    | FBgn0259966 | 0.311797       | Sfp51E    |
| FBgn0038819 | 0.393874       | Cpr92F    | FBgn0028482 | 0.3112         | CG16857   |
| FBgn0039061 | 0.384126       | Ir        | FBgn0050043 | 0.307662       | CG30043   |
| FBgn0050021 | 0.374556       | skf       | FBgn0033304 | 0.307415       | Cyp6a13   |
| FBgn0039293 | 0.369886       | CG11851   | FBgn0039969 | 0.306813       | Fis1      |
| FBgn0003248 | 0.36957        | Rh2       | FBgn0032474 | 0.302561       | DnaJ-H    |
| FBgn0026576 | 0.362997       | CG5991    | FBgn0039107 | 0.301822       | CG10300   |
| FBgn0014141 | 0.362454       | cher      | FBgn0040397 | 0.30087        | CG3655    |
| FBgn0031529 | 0.36213        | CG9662    | FBgn0020767 | 0.300498       | Spred     |
| FBgn0026758 | 0.356538       | Trf2      | FBgn0033806 | 0.300339       | CG4616    |
| FBgn0038815 | 0.354985       | CG5466    | FBgn0022073 | 0.299715       | Thor      |
| FBgn0086677 | 0.354284       | jeb       | FBgn0032763 | 0.297223       | CG17568   |
| FBgn0034263 | 0.353819       | CG10934   | _Bgn0013433 | 0.296955       | beat-Ia   |
| FBgn0039238 | 0.352161       | CG7016    | FBgn0033252 | 0.296132       | CG12769   |

|             |          |         |  |             |          |        |
|-------------|----------|---------|--|-------------|----------|--------|
| FBgn0039239 | 0.352161 | CG13641 |  | FBgn0038407 | 0.296092 | CG6126 |
| FBgn0031522 | 0.344939 | CG3285  |  | FBgn0015844 | 0.295943 | Xpd    |

---

We calculated the mean  $F_{ST}$  of each gene's 3'UTR region and list the top 2.5%.



TABLE S3

Genes in the top 2.5% of whole-gene nonsynonymous  $F_{ST}$  differentiation.

| Gene ID     | Nonsyn $F_{ST}$ | Gene Name | Gene ID     | Nonsyn $F_{ST}$ | Gene Name    |
|-------------|-----------------|-----------|-------------|-----------------|--------------|
| FBgn0031345 | 0.440546        | CG18132   | FBgn0035687 | 0.261204        | CG13296      |
| FBgn0086677 | 0.432406        | jeb       | FBgn0051380 | 0.260273        | CG31380      |
| FBgn0034288 | 0.41522         | CG5084    | FBgn0035216 | 0.257985        | CG9168       |
| FBgn0032331 | 0.401399        | CG14913   | FBgn0031321 | 0.255153        | Tgt          |
| FBgn0033093 | 0.38458         | CG3270    | FBgn0036951 | 0.255088        | CG7017       |
| FBgn0033697 | 0.384211        | Cyp6t3    | FBgn0039413 | 0.254965        | CG14556      |
| FBgn0053339 | 0.381734        | CG33339   | FBgn0025676 | 0.254259        | CkIIalpha-i3 |
| FBgn0053205 | 0.376138        | CG33205   | FBgn0260011 | 0.254035        | nimC4        |
| FBgn0035276 | 0.37592         | CG12022   | FBgn0021764 | 0.253939        | sdk          |
| FBgn0029173 | 0.373758        | fu2       | FBgn0038195 | 0.253804        | CG3061       |
| FBgn0051082 | 0.372544        | CG31082   | FBgn0003486 | 0.2534          | spo          |
| FBgn0025621 | 0.372522        | CG16989   | FBgn0036593 | 0.253169        | CG13048      |
| FBgn0085401 | 0.367414        | CG34372   | FBgn0051265 | 0.252429        | CG31265      |
| FBgn0011285 | 0.352576        | S6kII     | FBgn0035268 | 0.251505        | CG8001       |
| FBgn0051851 | 0.338734        | CG31851   | FBgn0031975 | 0.248371        | Tg           |
| FBgn0066101 | 0.331073        | LpR1      | FBgn0052104 | 0.248324        | CG32104      |
| FBgn0045476 | 0.329101        | Gr64e     | FBgn0039167 | 0.248287        | CG17786      |
| FBgn0015905 | 0.328591        | ast       | FBgn0031739 | 0.247517        | CG14005      |
| FBgn0035313 | 0.328007        | CG13810   | FBgn0032843 | 0.247437        | CG10730      |
| FBgn0085449 | 0.325412        | CG34420   | FBgn0015230 | 0.246036        | Glut3        |
| FBgn0003861 | 0.324953        | trp       | FBgn0034295 | 0.245982        | CG10911      |
| FBgn0051205 | 0.319649        | CG31205   | FBgn0052154 | 0.245111        | CG32154      |
| FBgn0039183 | 0.316728        | Dis3      | FBgn0033473 | 0.244758        | CG12128      |
| FBgn0038144 | 0.316311        | CG8870    | FBgn0028482 | 0.244381        | CG16857      |
| FBgn0052549 | 0.31354         | CG32549   | FBgn0033742 | 0.244029        | CG8550       |
| FBgn0038153 | 0.311496        | Ir87a     | FBgn0031782 | 0.243645        | WDR79        |
| FBgn0039528 | 0.310709        | dsd       | FBgn0039079 | 0.243057        | Ir94g        |
| FBgn0036541 | 0.306629        | CG12486   | FBgn0036320 | 0.242916        | CG10943      |
| FBgn0040045 | 0.305202        | CG12460   | FBgn0028852 | 0.242757        | CG15262      |
| FBgn0038139 | 0.304808        | CG8795    | FBgn0038125 | 0.242423        | CG8141       |
| FBgn0031195 | 0.304405        | CG17600   | FBgn0039201 | 0.242182        | CG13617      |
| FBgn0065035 | 0.30298         | AlkB      | FBgn0037989 | 0.24141         | CG14741      |
| FBgn0034513 | 0.296861        | CG13423   | FBgn0043796 | 0.241249        | CG12219      |
| FBgn0038550 | 0.296205        | CG17801   | FBgn0035918 | 0.241212        | Cdc6         |
| FBgn0036249 | 0.294651        | CG11560   | FBgn0037817 | 0.240972        | Cyp12e1      |
| FBgn0020272 | 0.29456         | mst       | FBgn0034422 | 0.240814        | CG7137       |
| FBgn0032045 | 0.291513        | CG13087   | FBgn0036503 | 0.240784        | CG13454      |
| FBgn0085213 | 0.290632        | CG34184   | FBgn0036952 | 0.239612        | CG6933       |
| FBgn0052751 | 0.290399        | CG32751   | FBgn0039067 | 0.23927         | wda          |

|             |          |                       |             |          |           |
|-------------|----------|-----------------------|-------------|----------|-----------|
| FBgn0038238 | 0.290022 | CG14854               | FBgn0085481 | 0.238273 | CG34452   |
| FBgn0032066 | 0.289623 | CG9463                | FBgn0043005 | 0.23733  | CG10251   |
| FBgn0053503 | 0.288901 | Cyp12d1-d             | FBgn0039227 | 0.237257 | polybromo |
| FBgn0041607 | 0.288162 | asparagine-synthetase | FBgn0045487 | 0.236246 | Gr36a     |
| FBgn0260466 | 0.287405 | Indy-2                | FBgn0260873 | 0.236107 | CG42583   |
| FBgn0026737 | 0.286948 | CG6171                | FBgn0032370 | 0.236036 | CG12307   |
| FBgn0051005 | 0.286607 | CG31005               | FBgn0020640 | 0.235496 | Lcp65Ae   |
| FBgn0053012 | 0.285977 | CG33012               | FBgn0010328 | 0.234114 | woc       |
| FBgn0030946 | 0.284422 | CG6659                | FBgn0085253 | 0.233799 | CG34224   |
| FBgn0085305 | 0.282863 | CG34276               | FBgn0030054 | 0.233653 | Caf1-180  |
| FBgn0030752 | 0.282683 | CG9947                | FBgn0038133 | 0.232298 | Osi22     |
| FBgn0038850 | 0.280486 | CG17279               | FBgn0039684 | 0.231514 | Obp99d    |
| FBgn0039246 | 0.279792 | CG10845               | FBgn0030033 | 0.230891 | CG1387    |
| FBgn0033599 | 0.279459 | CG13223               | FBgn0033443 | 0.230715 | CG1698    |
| FBgn0036948 | 0.277711 | CG7298                | FBgn0039343 | 0.230581 | CG5111    |
| FBgn0259199 | 0.277513 | CG42303               | FBgn0035970 | 0.230459 | CG4483    |
| FBgn0025866 | 0.277104 | CalpB                 | FBgn0039467 | 0.230335 | CG14253   |
| FBgn0039083 | 0.276633 | CG10177               | FBgn0035771 | 0.229884 | sec63     |
| FBgn0032803 | 0.275137 | CG13082               | FBgn0038912 | 0.229665 | CG6656    |
| FBgn0033186 | 0.275072 | CG1602                | FBgn0033698 | 0.229018 | CG8858    |
| FBgn0040391 | 0.273132 | CG2854                | FBgn0014469 | 0.228657 | Cyp4e2    |
| FBgn0052107 | 0.271473 | CG32107               | FBgn0031961 | 0.227479 | CG7102    |
| FBgn0033187 | 0.27141  | CG2144                | FBgn0046689 | 0.227113 | Tak1      |
| FBgn0051251 | 0.268618 | CG31251               | FBgn0054041 | 0.226485 | CG34041   |
| FBgn0051461 | 0.267248 | CG31461               | FBgn0034141 | 0.22639  | CG8311    |
| FBgn0085341 | 0.265634 | CG34312               | FBgn0033850 | 0.226218 | CG13331   |
| FBgn0036193 | 0.265447 | CG14135               | FBgn0032142 | 0.225804 | CG13120   |
| FBgn0051099 | 0.265062 | CG31099               | FBgn0037533 | 0.225779 | CD98hc    |
| FBgn0036062 | 0.264058 | CG6685                | FBgn0039080 | 0.225681 | Ir94h     |
| FBgn0032484 | 0.263439 | kek4                  | FBgn0031817 | 0.225339 | CG9531    |
| FBgn0013949 | 0.262919 | Ela                   | FBgn0037248 | 0.225186 | Spargel   |
| FBgn0033289 | 0.262138 | CG2121                | FBgn0031429 | 0.224589 | CG15393   |
| FBgn0032602 | 0.26173  | CG13278               |             |          |           |

We calculated the mean nonsynonymous  $F_{ST}$  of each gene and list the top 2.5%

**TABLE S4****Genes in the top 2.5% of individual-domain nonsynonymous  $F_{ST}$  differentiation.**

| Gene ID     | Gene Name | Domain          | Nonsyn $F_{ST}$ |
|-------------|-----------|-----------------|-----------------|
| FBgn0033093 | CG3270    | DAO             | 0.38458         |
| FBgn0038260 | CG14855   | MFS 1           | 0.384254        |
| FBgn0033697 | Cyp6t3    | p450            | 0.384211        |
| FBgn0034295 | CG10911   | DUF725          | 0.360936        |
| FBgn0051380 | CG31380   | APH             | 0.342056        |
| FBgn0003510 | Sry-alpha | Serendipity A   | 0.33336         |
| FBgn0045476 | Gr64e     | 7tm 7           | 0.329101        |
| FBgn0051205 | CG31205   | Trypsin         | 0.319649        |
| FBgn0032602 | CG13278   | ASC             | 0.298351        |
| FBgn0034513 | CG13423   | Peptidase C1 2  | 0.296861        |
| FBgn0085213 | CG34184   | DM4 12          | 0.290632        |
| FBgn0260466 | Indy-2    | Na sulph symp   | 0.287405        |
| FBgn0030946 | CG6659    | Dpy19           | 0.284422        |
| FBgn0030752 | CG9947    | CDC50           | 0.282683        |
| FBgn0038850 | CG17279   | JHBP            | 0.280486        |
| FBgn0028852 | CG15262   | NOT2 3 5        | 0.278706        |
| FBgn0020377 | Sr-CII    | MAM             | 0.27817         |
| FBgn0031305 | Iris      | DUF3610         | 0.27248         |
| FBgn0033443 | CG1698    | SNF             | 0.268159        |
| FBgn0051099 | CG31099   | DUF227          | 0.265062        |
| FBgn0021764 | sdk       | fn3             | 0.263057        |
| FBgn0032066 | CG9463    | Glyco hydro 38C | 0.258052        |
| FBgn0038005 | Cyp313a5  | p450            | 0.257784        |
| FBgn0003486 | spo       | p450            | 0.2534          |
| FBgn0038465 | Irc       | An peroxidase   | 0.247982        |
| FBgn0054005 | CG34005   | DUF725          | 0.242942        |
| FBgn0038541 | TyrRII    | 7tm 1           | 0.239625        |
| FBgn0054049 | CG34049   | CAP             | 0.237954        |
| FBgn0045487 | Gr36a     | 7tm 7           | 0.236246        |

We calculated the mean nonsynonymous  $F_{ST}$  of each PFam domain in each gene and took the most-differentiated domain as that gene's representative domain. We list the top 2.5% of individual-domain differentiated genes.

**TABLE S5****Significantly-enriched Gene Ontology categories in top 2.5% 1kb  $F_{ST}$  regions.**

| <b>Biological Process</b> |          |                                                       |
|---------------------------|----------|-------------------------------------------------------|
| GO accession              | P-value  | Description                                           |
| GO:0007424                | 2.49E-09 | open tracheal system development                      |
| GO:0007428                | 1.56E-06 | primary branching, open tracheal system               |
| GO:0007165                | 1.56E-06 | signal transduction                                   |
| GO:0007427                | 1.56E-06 | epithelial cell migration, open tracheal system       |
| GO:0002121                | 2.21E-06 | inter-male aggressive behavior                        |
| GO:0007509                | 2.62E-06 | mesoderm migration                                    |
| GO:0042051                | 2.62E-06 | compound eye photoreceptor development                |
| GO:0006355                | 3.91E-06 | regulation of transcription, DNA-dependent            |
| GO:0007156                | 1.37E-05 | homophilic cell adhesion                              |
| GO:0048477                | 1.78E-05 | oogenesis                                             |
| GO:0007435                | 1.78E-05 | salivary gland morphogenesis                          |
| GO:0007507                | 1.82E-05 | heart development                                     |
| GO:0008543                | 2.13E-05 | fibroblast growth factor receptor signaling pathway   |
| GO:0035152                | 4.50E-05 | regulation of tube architecture, open tracheal system |
| GO:0007614                | 8.48E-05 | short-term memory                                     |
| GO:0006816                | 8.48E-05 | calcium ion transport                                 |
| GO:0007431                | 1.54E-04 | salivary gland development                            |
| GO:0007155                | 1.70E-04 | cell adhesion                                         |
| GO:0016044                | 2.50E-04 | membrane organization                                 |
| GO:0007293                | 4.51E-04 | germarium-derived egg chamber formation               |
| GO:0007411                | 4.51E-04 | axon guidance                                         |
| GO:0042048                | 4.51E-04 | olfactory behavior                                    |
| GO:0030707                | 4.51E-04 | ovarian follicle cell development                     |
| GO:0008101                | 4.87E-04 | decapentaplegic receptor signaling pathway            |
| GO:0045570                | 4.87E-04 | regulation of imaginal disc growth                    |
| GO:0035172                | 4.87E-04 | hemocyte proliferation                                |
| GO:0007443                | 4.88E-04 | Malpighian tubule morphogenesis                       |
| GO:0048813                | 4.88E-04 | dendrite morphogenesis                                |
| GO:0048190                | 5.67E-04 | wing disc dorsal/ventral pattern formation            |
| GO:0007422                | 7.20E-04 | peripheral nervous system development                 |
| GO:0016055                | 7.20E-04 | Wnt receptor signaling pathway                        |
| GO:0007611                | 7.20E-04 | learning or memory                                    |
| GO:0007426                | 1.12E-03 | tracheal outgrowth, open tracheal system              |
| GO:0006813                | 1.21E-03 | potassium ion transport                               |
| GO:0007517                | 1.32E-03 | muscle organ development                              |
| GO:0048066                | 1.52E-03 | pigmentation during development                       |
| GO:0007297                | 1.52E-03 | ovarian follicle cell migration                       |
| GO:0048675                | 1.52E-03 | axon extension                                        |

|            |          |                                                                  |
|------------|----------|------------------------------------------------------------------|
| GO:0006811 | 1.67E-03 | ion transport                                                    |
| GO:0007476 | 1.68E-03 | imaginal disc-derived wing morphogenesis                         |
| GO:0030718 | 1.72E-03 | germ-line stem cell maintenance                                  |
| GO:0007619 | 2.08E-03 | courtship behavior                                               |
| GO:0045449 | 2.19E-03 | regulation of transcription                                      |
| GO:0007379 | 2.38E-03 | segment specification                                            |
| GO:0007417 | 3.00E-03 | central nervous system development                               |
| GO:0007399 | 3.00E-03 | nervous system development                                       |
| GO:0030097 | 3.15E-03 | hemopoiesis                                                      |
| GO:0007274 | 3.15E-03 | neuromuscular synaptic transmission                              |
| GO:0007265 | 3.15E-03 | Ras protein signal transduction                                  |
| GO:0042078 | 3.15E-03 | germ-line stem cell division                                     |
| GO:0016199 | 3.46E-03 | axon midline choice point recognition                            |
| GO:0007602 | 3.46E-03 | phototransduction                                                |
| GO:0048666 | 3.54E-03 | neuron development                                               |
| GO:0008355 | 3.91E-03 | olfactory learning                                               |
| GO:0008407 | 4.18E-03 | bristle morphogenesis                                            |
| GO:0016477 | 4.18E-03 | cell migration                                                   |
| GO:0016339 | 4.96E-03 | calcium-dependent cell-cell adhesion                             |
| GO:0055085 | 5.47E-03 | transmembrane transport                                          |
| GO:0008063 | 5.77E-03 | Toll signaling pathway                                           |
| GO:0008354 | 5.77E-03 | germ cell migration                                              |
| GO:0006357 | 6.28E-03 | regulation of transcription from RNA polymerase II promoter      |
| GO:0035147 | 6.60E-03 | branch fusion, open tracheal system                              |
| GO:0008344 | 6.60E-03 | adult locomotory behavior                                        |
| GO:0009953 | 6.60E-03 | dorsal/ventral pattern formation                                 |
| GO:0035277 | 6.60E-03 | spiracle morphogenesis, open tracheal system                     |
| GO:0006325 | 6.93E-03 | chromatin organization                                           |
| GO:0007494 | 6.93E-03 | midgut development                                               |
| GO:0002009 | 6.93E-03 | morphogenesis of an epithelium                                   |
| GO:0006468 | 8.66E-03 | protein amino acid phosphorylation                               |
| GO:0019991 | 8.81E-03 | septate junction assembly                                        |
| GO:0007442 | 8.81E-03 | hindgut morphogenesis                                            |
| GO:0007291 | 8.81E-03 | sperm individualization                                          |
| GO:0007294 | 8.81E-03 | germarium-derived oocyte fate determination                      |
| GO:0035071 | 9.76E-03 | salivary gland cell autophagic cell death                        |
| GO:0007298 | 9.76E-03 | border follicle cell migration                                   |
| GO:0008104 | 1.11E-02 | protein localization                                             |
| GO:0000381 | 1.11E-02 | regulation of alternative nuclear mRNA splicing, via spliceosome |
| GO:0017148 | 1.11E-02 | negative regulation of translation                               |
| GO:0051225 | 1.11E-02 | spindle assembly                                                 |

|            |          |                                                                      |
|------------|----------|----------------------------------------------------------------------|
| GO:0001745 | 1.11E-02 | compound eye morphogenesis                                           |
| GO:0008360 | 1.12E-02 | regulation of cell shape                                             |
| GO:0007391 | 1.18E-02 | dorsal closure                                                       |
| GO:0007498 | 1.35E-02 | mesoderm development                                                 |
| GO:0007179 | 1.42E-02 | transforming growth factor beta receptor signaling pathway           |
| GO:0007350 | 1.42E-02 | blastoderm segmentation                                              |
| GO:0016481 | 1.45E-02 | negative regulation of transcription                                 |
| GO:0001700 | 1.49E-02 | embryonic development via the syncytial blastoderm                   |
| GO:0007409 | 1.79E-02 | axonogenesis                                                         |
| GO:0030162 | 1.80E-02 | regulation of proteolysis                                            |
| GO:0048749 | 1.95E-02 | compound eye development                                             |
| GO:0007018 | 1.95E-02 | microtubule-based movement                                           |
| GO:0007268 | 1.98E-02 | synaptic transmission                                                |
| GO:0007275 | 2.04E-02 | multicellular organismal development                                 |
| GO:0035023 | 2.20E-02 | regulation of Rho protein signal transduction                        |
| GO:0007367 | 2.20E-02 | segment polarity determination                                       |
| GO:0006911 | 2.50E-02 | phagocytosis, engulfment                                             |
| GO:0048102 | 2.57E-02 | autophagic cell death                                                |
| GO:0009987 | 2.72E-02 | cellular process                                                     |
| GO:0006096 | 2.82E-02 | glycolysis                                                           |
| GO:0016318 | 3.31E-02 | ommatidial rotation                                                  |
| GO:0008045 | 3.31E-02 | motor axon guidance                                                  |
| GO:0030036 | 3.80E-02 | actin cytoskeleton organization                                      |
| GO:0046843 | 3.82E-02 | dorsal appendage formation                                           |
| GO:0045475 | 3.82E-02 | locomotor rhythm                                                     |
| GO:0006342 | 3.82E-02 | chromatin silencing                                                  |
| GO:0051726 | 3.82E-02 | regulation of cell cycle                                             |
| GO:0007474 | 3.82E-02 | imaginal disc-derived wing vein specification                        |
| GO:0006350 | 3.82E-02 | transcription                                                        |
| GO:0007186 | 4.03E-02 | G-protein coupled receptor protein signaling pathway                 |
| GO:0000122 | 4.78E-02 | negative regulation of transcription from RNA polymerase II promoter |

### Molecular Function

| GO accession | P-value  | Description                                                         |
|--------------|----------|---------------------------------------------------------------------|
| GO:0005515   | 1.57E-08 | protein binding                                                     |
| GO:0003700   | 8.12E-07 | transcription factor activity                                       |
| GO:0005509   | 1.93E-04 | calcium ion binding                                                 |
| GO:0004889   | 3.64E-04 | nicotinic acetylcholine-activated cation-selective channel activity |
| GO:0003729   | 3.64E-04 | mRNA binding                                                        |
| GO:0003702   | 3.64E-04 | RNA polymerase II transcription factor activity                     |
| GO:0004871   | 3.64E-04 | signal transducer activity                                          |

|            |          |                                                          |
|------------|----------|----------------------------------------------------------|
| GO:0043565 | 8.02E-04 | sequence-specific DNA binding                            |
| GO:0008188 | 1.87E-03 | neuropeptide receptor activity                           |
| GO:0003704 | 1.89E-03 | specific RNA polymerase II transcription factor activity |
| GO:0003777 | 3.08E-03 | microtubule motor activity                               |
| GO:0005096 | 5.38E-03 | GTPase activator activity                                |
| GO:0016566 | 5.92E-03 | specific transcriptional repressor activity              |
| GO:0016563 | 6.18E-03 | transcription activator activity                         |
| GO:0005249 | 7.73E-03 | voltage-gated potassium channel activity                 |
| GO:0003723 | 8.11E-03 | RNA binding                                              |
| GO:0003779 | 9.12E-03 | actin binding                                            |
| GO:0004888 | 1.02E-02 | transmembrane receptor activity                          |
| GO:0005085 | 1.02E-02 | guanyl-nucleotide exchange factor activity               |
| GO:0008270 | 1.20E-02 | zinc ion binding                                         |
| GO:0003676 | 1.27E-02 | nucleic acid binding                                     |
| GO:0003730 | 1.64E-02 | mRNA 3'-UTR binding                                      |
| GO:0000166 | 1.68E-02 | nucleotide binding                                       |
| GO:0016251 | 2.52E-02 | general RNA polymerase II transcription factor activity  |
| GO:0016887 | 2.52E-02 | ATPase activity                                          |
| GO:0004725 | 2.97E-02 | protein tyrosine phosphatase activity                    |
| GO:0005089 | 3.17E-02 | Rho guanyl-nucleotide exchange factor activity           |
| GO:0005524 | 3.65E-02 | ATP binding                                              |
| GO:0004674 | 3.67E-02 | protein serine/threonine kinase activity                 |
| GO:0042623 | 3.67E-02 | ATPase activity, coupled                                 |
| GO:0005102 | 3.67E-02 | receptor binding                                         |
| GO:0004930 | 4.02E-02 | G-protein coupled receptor activity                      |
| GO:0005516 | 4.16E-02 | calmodulin binding                                       |
| GO:0003713 | 4.98E-02 | transcription coactivator activity                       |

---

Reported P-values are corrected for a false-discovery rate of 0.05.

TABLE S6

**Significantly-enriched Gene Ontology categories in top 1% 1kb copy-number variable (CNV) regions.**

| <b>Biological Process</b> |          |                                                      |
|---------------------------|----------|------------------------------------------------------|
| GO accession              | P-value  | Description                                          |
| GO:0006355                | 3.58E-10 | regulation of transcription, DNA-dependent           |
| GO:0007417                | 1.10E-08 | central nervous system development                   |
| GO:0045449                | 6.87E-08 | regulation of transcription                          |
| GO:0007507                | 3.73E-06 | heart development                                    |
| GO:0007155                | 1.98E-05 | cell adhesion                                        |
| GO:0008585                | 3.54E-05 | female gonad development                             |
| GO:0006813                | 3.81E-05 | potassium ion transport                              |
| GO:0048477                | 1.20E-04 | oogenesis                                            |
| GO:0001700                | 1.55E-04 | embryonic development via the syncytial blastoderm   |
| GO:0007399                | 5.02E-04 | nervous system development                           |
| GO:0007304                | 5.70E-04 | chorion-containing eggshell formation                |
| GO:0007619                | 5.97E-04 | courtship behavior                                   |
| GO:0008587                | 7.14E-04 | imaginal disc-derived wing margin morphogenesis      |
| GO:0007411                | 7.35E-04 | axon guidance                                        |
| GO:0007186                | 8.06E-04 | G-protein coupled receptor protein signaling pathway |
| GO:0007494                | 8.06E-04 | midgut development                                   |
| GO:0007480                | 9.94E-04 | imaginal disc-derived leg morphogenesis              |
| GO:0007165                | 1.03E-03 | signal transduction                                  |
| GO:0007476                | 1.03E-03 | imaginal disc-derived wing morphogenesis             |
| GO:0008360                | 1.03E-03 | regulation of cell shape                             |
| GO:0045475                | 1.33E-03 | locomotor rhythm                                     |
| GO:0007422                | 1.39E-03 | peripheral nervous system development                |
| GO:0007224                | 1.53E-03 | smoothened signaling pathway                         |
| GO:0048190                | 1.72E-03 | wing disc dorsal/ventral pattern formation           |
| GO:0042048                | 1.80E-03 | olfactory behavior                                   |
| GO:0002121                | 1.86E-03 | inter-male aggressive behavior                       |
| GO:0007623                | 1.95E-03 | circadian rhythm                                     |
| GO:0008354                | 1.95E-03 | germ cell migration                                  |
| GO:0008104                | 2.26E-03 | protein localization                                 |
| GO:0007455                | 2.51E-03 | eye-antennal disc morphogenesis                      |
| GO:0035023                | 2.87E-03 | regulation of Rho protein signal transduction        |
| GO:0016318                | 2.87E-03 | ommatidial rotation                                  |
| GO:0007400                | 2.87E-03 | neuroblast fate determination                        |
| GO:0007015                | 2.96E-03 | actin filament organization                          |
| GO:0008285                | 3.38E-03 | negative regulation of cell proliferation            |
| GO:0009987                | 5.31E-03 | cellular process                                     |
| GO:0006911                | 5.79E-03 | phagocytosis, engulfment                             |



|            |          |                                                                      |
|------------|----------|----------------------------------------------------------------------|
| GO:0016321 | 8.07E-03 | female meiosis chromosome segregation                                |
| GO:0009790 | 8.83E-03 | embryonic development                                                |
| GO:0007419 | 8.83E-03 | ventral cord development                                             |
| GO:0048749 | 8.83E-03 | compound eye development                                             |
| GO:0007268 | 9.23E-03 | synaptic transmission                                                |
| GO:0007517 | 9.23E-03 | muscle organ development                                             |
| GO:0007163 | 9.23E-03 | establishment or maintenance of cell polarity                        |
| GO:0008407 | 9.23E-03 | bristle morphogenesis                                                |
| GO:0016567 | 9.23E-03 | protein ubiquitination                                               |
| GO:0007498 | 1.17E-02 | mesoderm development                                                 |
| GO:0006508 | 1.17E-02 | proteolysis                                                          |
| GO:0006366 | 1.32E-02 | transcription from RNA polymerase II promoter                        |
| GO:0016481 | 1.32E-02 | negative regulation of transcription                                 |
| GO:0007423 | 1.34E-02 | sensory organ development                                            |
| GO:0006350 | 1.42E-02 | transcription                                                        |
| GO:0007420 | 1.42E-02 | brain development                                                    |
| GO:0030707 | 1.71E-02 | ovarian follicle cell development                                    |
| GO:0007611 | 1.96E-02 | learning or memory                                                   |
| GO:0030036 | 1.96E-02 | actin cytoskeleton organization                                      |
| GO:0006357 | 1.97E-02 | regulation of transcription from RNA polymerase II promoter          |
| GO:0016055 | 1.97E-02 | Wnt receptor signaling pathway                                       |
| GO:0007269 | 2.02E-02 | neurotransmitter secretion                                           |
| GO:0006470 | 2.03E-02 | protein amino acid dephosphorylation                                 |
| GO:0006468 | 2.05E-02 | protein amino acid phosphorylation                                   |
| GO:0007242 | 2.12E-02 | intracellular signaling cascade                                      |
| GO:0007219 | 2.20E-02 | Notch signaling pathway                                              |
| GO:0035071 | 2.24E-02 | salivary gland cell autophagic cell death                            |
| GO:0007409 | 2.34E-02 | axonogenesis                                                         |
| GO:0019730 | 2.34E-02 | antimicrobial humoral response                                       |
| GO:0000381 | 2.49E-02 | regulation of alternative nuclear mRNA splicing, via spliceosome     |
| GO:0007298 | 2.68E-02 | border follicle cell migration                                       |
| GO:0008355 | 3.04E-02 | olfactory learning                                                   |
| GO:0000122 | 3.30E-02 | negative regulation of transcription from RNA polymerase II promoter |
| GO:0016319 | 3.57E-02 | mushroom body development                                            |
| GO:0007017 | 4.20E-02 | microtubule-based process                                            |
| GO:0008283 | 4.71E-02 | cell proliferation                                                   |
| GO:0006811 | 4.82E-02 | ion transport                                                        |

**Molecular Function**

| GO accession | P-value  | Description                                              |
|--------------|----------|----------------------------------------------------------|
| GO:0003700   | 1.71E-13 | transcription factor activity                            |
| GO:0005515   | 4.61E-13 | protein binding                                          |
| GO:0008270   | 2.69E-11 | zinc ion binding                                         |
| GO:0043565   | 7.85E-08 | sequence-specific DNA binding                            |
| GO:0004879   | 3.69E-06 | ligand-dependent nuclear receptor activity               |
| GO:0003704   | 5.63E-06 | specific RNA polymerase II transcription factor activity |
| GO:0005041   | 6.03E-06 | low-density lipoprotein receptor activity                |
| GO:0030528   | 8.75E-06 | transcription regulator activity                         |
| GO:0003702   | 1.03E-04 | RNA polymerase II transcription factor activity          |
| GO:0008239   | 1.91E-04 | dipeptidyl-peptidase activity                            |
| GO:0003779   | 1.91E-04 | actin binding                                            |

|            |          |                                                |
|------------|----------|------------------------------------------------|
| GO:0003707 | 3.69E-04 | steroid hormone receptor activity              |
| GO:0000166 | 4.35E-04 | nucleotide binding                             |
| GO:0016566 | 5.63E-04 | specific transcriptional repressor activity    |
| GO:0005249 | 5.95E-04 | voltage-gated potassium channel activity       |
| GO:0003729 | 6.33E-04 | mRNA binding                                   |
| GO:0004930 | 9.72E-04 | G-protein coupled receptor activity            |
| GO:0005089 | 3.13E-03 | Rho guanyl-nucleotide exchange factor activity |
| GO:0005509 | 3.30E-03 | calcium ion binding                            |
| GO:0004872 | 5.40E-03 | receptor activity                              |
| GO:0004871 | 6.59E-03 | signal transducer activity                     |
| GO:0005200 | 6.59E-03 | structural constituent of cytoskeleton         |
| GO:0004674 | 7.26E-03 | protein serine/threonine kinase activity       |
| GO:0004222 | 8.70E-03 | metalloendopeptidase activity                  |
| GO:0042803 | 8.70E-03 | protein homodimerization activity              |
| GO:0008188 | 9.50E-03 | neuropeptide receptor activity                 |
| GO:0046982 | 1.52E-02 | protein heterodimerization activity            |
| GO:0004725 | 2.36E-02 | protein tyrosine phosphatase activity          |
| GO:0005198 | 3.55E-02 | structural molecule activity                   |
| GO:0004842 | 3.66E-02 | ubiquitin-protein ligase activity              |
| GO:0051082 | 3.66E-02 | unfolded protein binding                       |
| GO:0016564 | 3.66E-02 | transcription repressor activity               |
| GO:0003676 | 4.08E-02 | nucleic acid binding                           |

---

Reported P-values are corrected for a false-discovery rate of 0.05.

**TABLE S7**

**The highly-differentiated circadian-regulation gene *norpA* and its known genetic-interaction partners.**

---

| FB accession | Gene         | Functional Description                                          |
|--------------|--------------|-----------------------------------------------------------------|
| FBgn0004625* | <i>norpA</i> | phospholypase C, temperature synchronization of circadian clock |
| FBgn0025680* | <i>Cry</i>   | response to light, circadian clock synchronization              |
| FBgn0003218* | <i>RdgB</i>  | required for light response                                     |
| FBgn0000121  | <i>Arr2</i>  | deactivation of rhodopsin-mediated signaling                    |
| FBgn0039774  | <i>CDase</i> | synaptic transmission                                           |
| FBgn0002524  | <i>lace</i>  | –                                                               |
| FBgn0002940* | <i>ninaE</i> | response to light                                               |
| FBgn0085373* | <i>rdgA</i>  | rhodopsin signaling pathway                                     |

---

Asterisks (\*) indicate that the gene is in the top 2.5% of 1kb  $F_{ST}$  windows.



## FILE S1

## Corrections for pooled sampling

The nature of our experimental design creates additional noise that we must correct for in our population genetic estimates. In particular, the pooled DNA sequencing design of this manuscript creates a second level of binomial sampling, beyond what is associated with the “normal” population genetic survey. Throughout we assume that a sample of size  $n$  chromosomes is taken from nature and pooled for sequencing. This sequencing is performed to depth  $m$  which may be variable among loci/sites. Conditioning on a population frequency of the  $A_1$  allele  $p$ , the probability of sampling  $i$  out of  $n$   $A_1$  alleles in our initial sample is simply binomial with parameters  $n$  and  $p$ . Thus the expected value of the sample frequency  $E(i/n) = p$  and the second moment is  $E((i/n)^2) = \frac{p(1-p)}{n} + p^2$ .

We will first derive similar results for the pooled sampling design, and then move on to estimation of population genetic statistics. The probability of sampling  $k$   $A_1$  alleles out of  $m$  in our pooled sequences conditional upon having sampled  $i$  out of  $n$  in our initial sampling is again binomial, this time with parameters  $m$  and  $i/n$ . Thus the probability of sequencing  $k$  out of  $m$  reads of the  $A_1$  allele conditional upon the population allele frequency is

$$Prob(X = k|m, n, p) = \sum_{i=0}^n \binom{m}{k} (i/n)^k (1 - i/n)^{m-k} \binom{n}{i} p^i (1-p)^{n-i}. \quad (1)$$

The expected value of the frequency of the allele in our sequenced sample,  $k/m$ , can then

be easily found through the use of conditional expectations

$$\begin{aligned} E\{k/m\} &= E\{E\{k/m|i/n\}\} \\ &= \sum_{i=0}^n E\{k/m|i/n\} \times Prob(i) \\ &= \sum_{i=0}^n \frac{m(i/n)}{m} \binom{n}{i} p^i (1-p)^{n-i} = p \end{aligned} \quad (2)$$

We can find the second moment through similar means

$$\begin{aligned} E\{(k/m)^2\} &= E\{E\{(k/m)^2|i/n\}\} \\ &= \sum_{i=0}^n E\{(k/m)^2|i/n\} \times Prob(i) \\ &= \sum_{i=0}^n \left\{ \frac{(i/n)(1-i/n)}{m} + (i/n)^2 \right\} \times Prob(i) \\ &= \sum_{i=0}^n \frac{(i/n)(1-i/n)}{m} \times Prob(i) + \sum_{i=0}^n (i/n)^2 \times Prob(i) \end{aligned} \quad (3)$$

There are two terms in equation 3. This second term is immediately recognizable as the second moment that we examined above (i.e.  $\frac{p(1-p)}{n} + p^2$ ). The first term after a bit of algebra turns into

$$\frac{1}{m} \left\{ p(1-p) - \frac{p(1-p)}{n} \right\}$$

putting it all together, the expectation of the second moment, conditional upon the population allele frequency is

$$E\{(k/m)^2\} = p(1-p)/m - p(1-p)/mn + p(1-p)/n$$

With that result in hand we are now ready to write down the expectation of heterozygosity ( $H = 2p(1-p)$ ) given our population allele frequency

$$\begin{aligned} E\{H\} &= E\{2p(1-p)\} = 2(E\{p\} - E\{p^2\}) \\ &= 2\left(p - p(1-p)/m + p(1-p)/mn - p(1-p)/n\right) \\ &= 2p(1-p)((n-1)/n)((m-1)/m) \end{aligned} \tag{4}$$

This leads to a simple bias correction on our estimates of heterozygosity which is  $n/(n-1) \times m/(m-1)$ . Figure S7 shows coalescent simulation results, where we generated samples from the standard coalescent model, and then resampled chromosomes with replacement to a coverage depth  $m$ . We then applied both the “double” correction derived here and the standard single correction. As can be seen in that figure, we do indeed have an unbiased estimator of heterozygosity if we correct for both the original size of our pooled sample and the coverage.

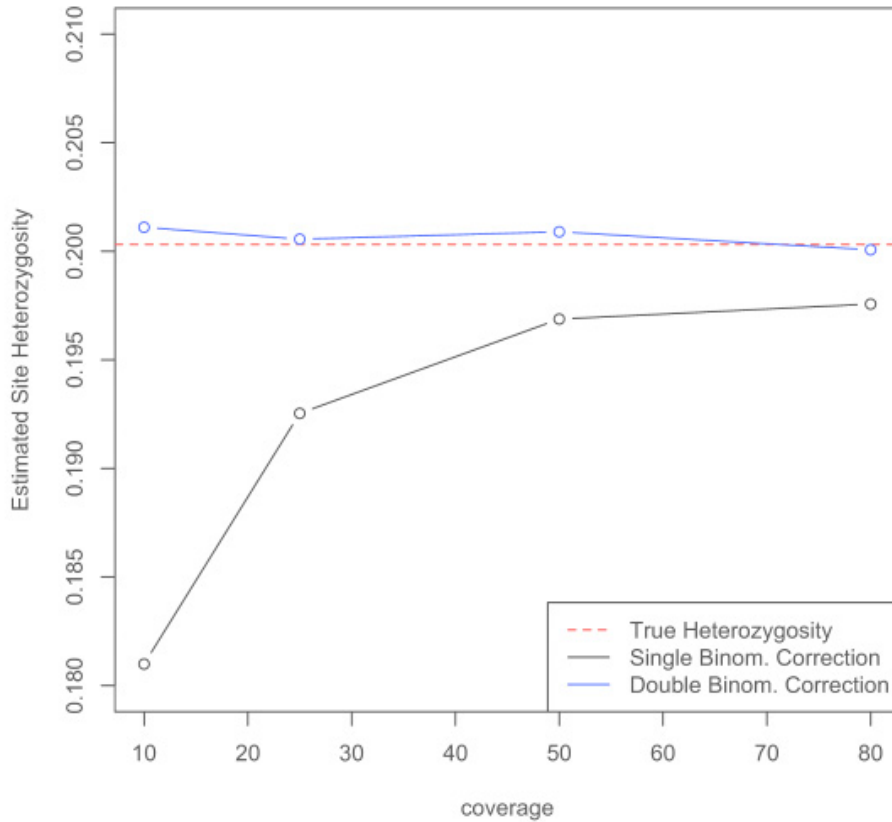

FIGURE S5.—Simulation results showing the corrected heterozygosity (eqn 4) is effective across a range of coverages used in this manuscript

## Estimating $\theta$

Of interest to us is coming up with an unbiased estimator of  $\theta = 4Nu$  in the face of our pooled sampling strategy. Recently (Futschik and Schlotterer 2010) have done quite a bit of work on this problem, and they were able to come up with corrected estimators for  $\theta_p i$  and  $\theta_w$ . Here we derive ostensibly similar results through different means, and arrive at a generalized correction for pooled sampling which allows for construction of arbitrary estimators of  $\theta$  as linear combinations of the site frequency spectrum using the system of (Achaz 2008).

We start by generalizing equation 1 of the supplement across the sample site frequency spectrum (SFS) expected under the standard neutral model. The probability of observing an allele segregating at frequency  $i$  out of  $n$  in a standard sample is  $Prob(i|n) = 1/ia_n$ , where  $a_n = \sum_{i=1}^{n-1} 1/i$  (Ewens 2004). Thus the probability of observing an allele at frequency  $k$  out of  $m$  reads in our pooled sequence sample unconditional on the population

frequency is

$$\begin{aligned} \text{Prob}(k|m, n) &= \sum_{i=1}^{n-1} \text{Prob}(K|m, n, i) \text{Prob}(i) \\ &= \sum_{i=1}^{n-1} \binom{m}{k} (i/n)^k (1-i/n)^{m-k} (1/ia_n) \end{aligned} \quad (5)$$

This expression allows us to write down the expected number of sites segregating at frequency  $k$  out of  $m$ , call it  $Y_k$  as a function of the mutation rate  $\theta$ . Conditioning on the expected number of segregating sites  $S$  in our initial sample of size  $n$  allows us to write down the expected values of the  $Y_k$ s as

$$\begin{aligned} E\{Y_k\} &= E\{S\} \times \text{Prob}(k|m, n) \\ &= \theta a_n \sum_{i=1}^{n-1} \binom{m}{k} (i/n)^k (1-i/n)^{m-k} (1/ia_n) \end{aligned} \quad (6)$$

To check the accuracy of this expression we performed coalescent simulations with a specified sample size  $n$  and mutation rate  $\theta$ . The initial site frequency spectrum was recorded and then transformed to mimic our pooled sequencing by sampling alleles at each segregating site with replacement. This yields a transformed SFS  $Y$  – see figure S6.

Given the accuracy of our correction for the SFS we move on to derive a bias corrected estimation scheme for  $\theta$ . In particular we note that rearrangement of equation 6 suggests a moment estimator of the type derived in Fu (1995),

$$\hat{\theta} = \frac{Y_i}{a_n} \frac{1}{\text{Prob}(k|m, n)}$$

Achaz (2009) noted that linear combinations of the SFS can be used to derive new estimators of  $\theta$  given some arbitrary weighting scheme. In this context we can write down the bias corrected version of Achaz's generic estimator as

$$\hat{\theta}_\omega = \frac{1}{a_n \sum_k \omega_k} \sum_{k=1}^{m-1} \omega_k Y_k \frac{1}{\text{Prob}(k|m, n)}. \quad (7)$$

In this manuscript we focus attention on Tajima's nucleotide diversity ( $\hat{\theta}_\pi$ ) and Fay and Wu's ( $\hat{\theta}_H$ ) (Tajima 1983; Fay and Wu 2000). To show the potential generality of our correction scheme we present coalescent simulation results as before where we have estimated  $\theta$  using six different weighting schemes:  $\omega_{\pi,i}$ ,  $\omega_{H,i}$ , and  $\omega_{W,i}$ , each with and without use of singletons

$$\begin{aligned}\omega_{\pi,i} &= n - i \\ \omega_{H,i} &= i \\ \omega_{W,i} &= i^{-1}\end{aligned}$$

In the case where singletons are ignored each of the  $\omega_1 = 0$ . As can be seen in Figure S7 our bias corrected estimates are quite accurate, thus the framework we have introduced here should be general.



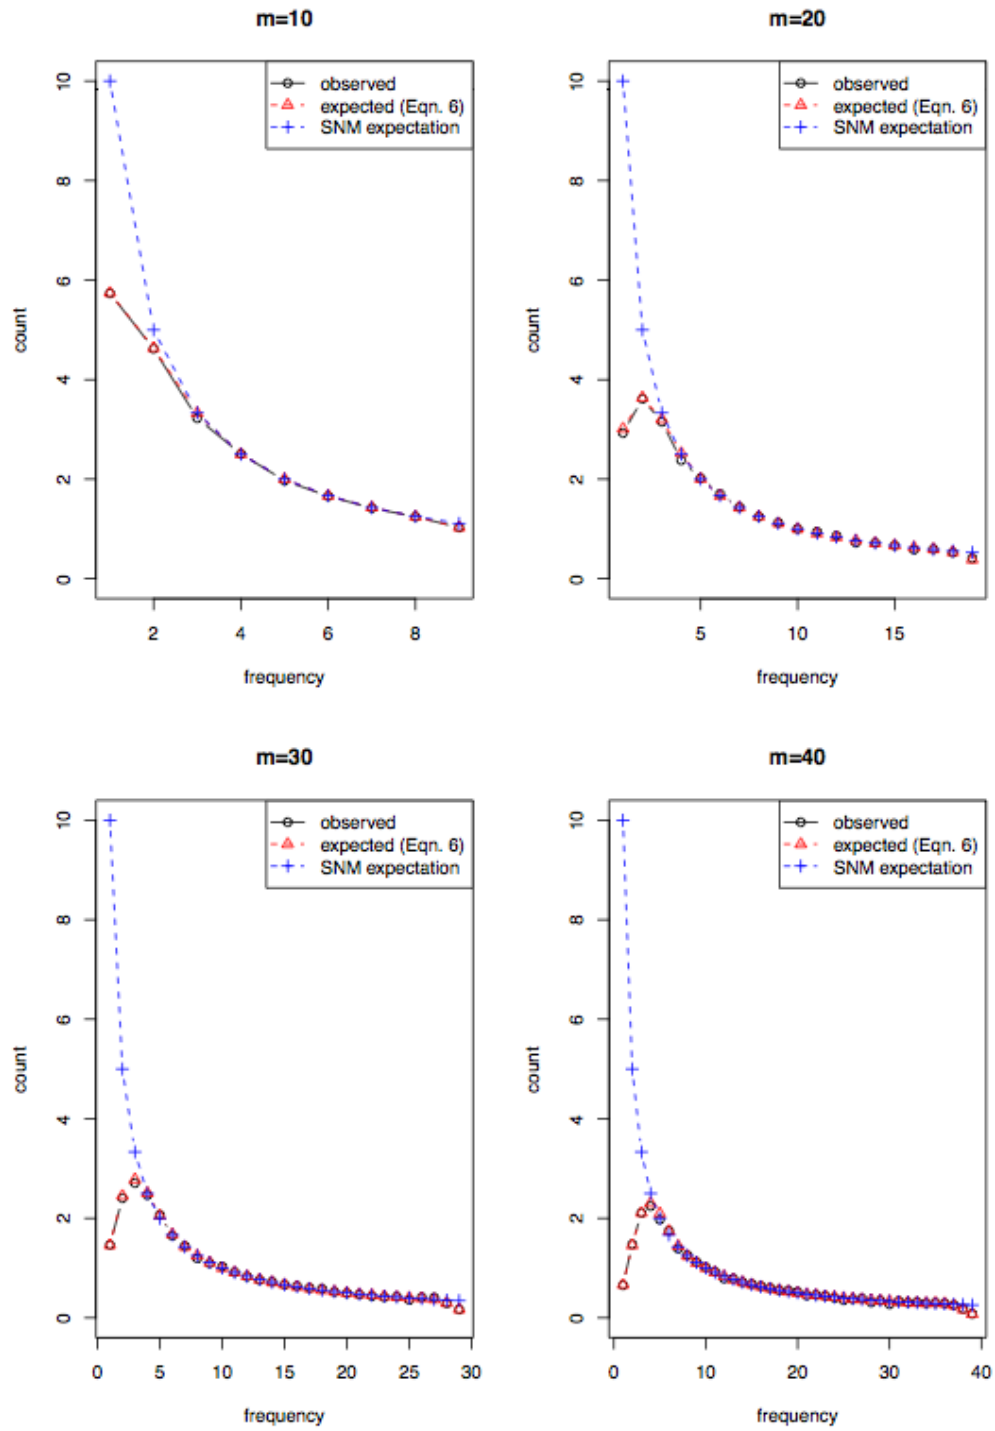

FIGURE S6.—Simulation results showing the correspondence between the observed and expected site frequency spectrum as  $m$  the sequencing depth changes. 1000 coalescent simulations were run with  $n=10$  and  $\theta=10$ . The expected values in red are derived from equation 6. Shown for comparison in blue are the expectations under the standard neutral model.

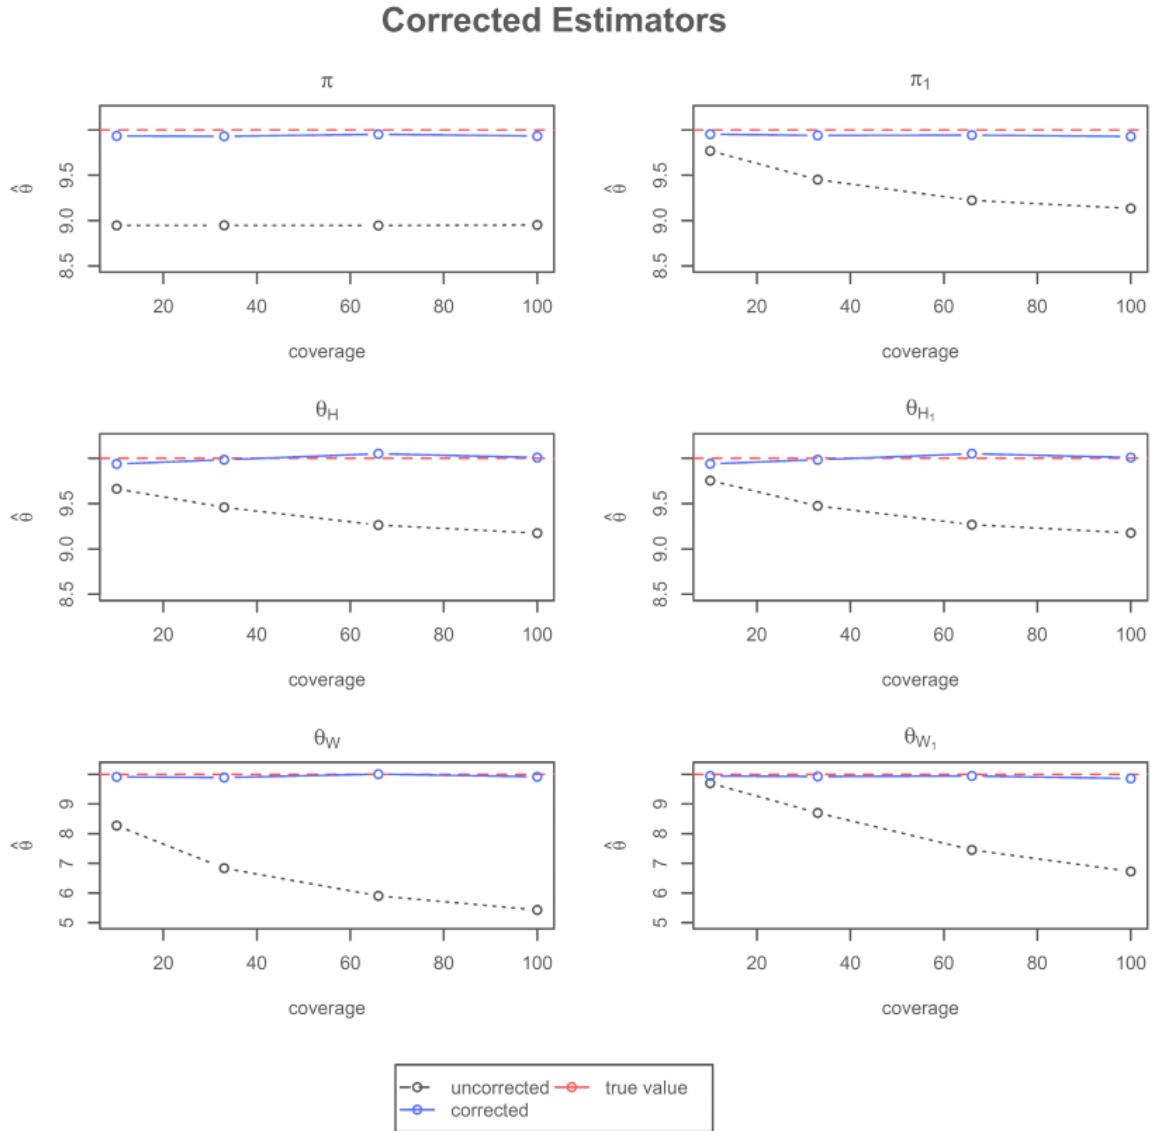

FIGURE S7.—Simulation results showing the performance of our bias corrected estimators of  $\theta$ . 1000 coalescent simulations were run with  $n = 40$  and  $\theta = 10$ . Uncorrected estimates are shown in black.

**REFERENCES**

- ACHAZ, G., 2008, (Jul) Testing for neutrality in samples with sequencing errors. *Genetics* *179* (3): 1409–1424.
- ACHAZ, G., 2009 Frequency spectrum neutrality tests: one for all and all for one. *Genetics* *183* (1): 249–58.
- EWENS, W. J., 2004 *Mathematical population genetics* (2nd ed ed.), Volume v. 27. New York: Springer.
- FAY, J. C. and C. I. WU, 2000, (Jul) Hitchhiking under positive Darwinian selection. *Genetics* *155* (3): 1405–13.
- FU, Y. X., 1995 Statistical Properties of Segregating Sites. *Theoretical Population Biology* **48**: 172–197.
- FUTSCHIK, A. and C. SCHLOTTERER, 2010 Massively Parallel Sequencing of Pooled DNA Samples—The Next Generation of Molecular Markers. *Genetics*.
- TAJIMA, F., 1983, (Oct) Evolutionary relationship of DNA sequences in finite populations. *Genetics* *105* (2): 437–60.
