# Supplementary material for: Genomic Differentiation Between Temperate and Tropical Australian Populations ofDrosophila melanogaster
Source: Oxford University Press journal article supplement (doi:10.1534/genetics.110.123059), 2010-11-09
Supplement: figures1.pdf [file figures1.pdf]

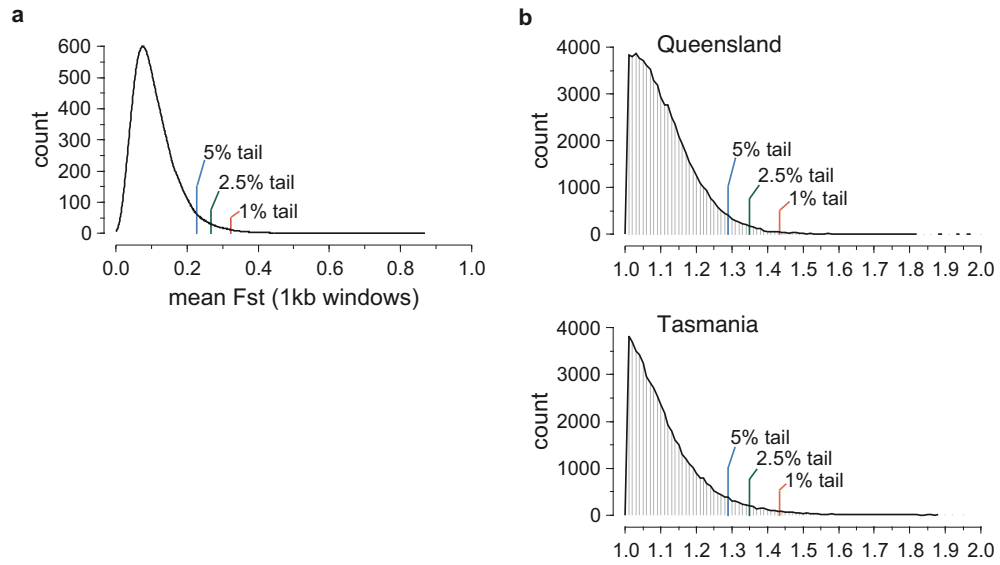

FIGURE S1.—Upper-tail  $F_{ST}$  and copy-number ratio cutoffs used in this study. We bin nonoverlapping 1kb genomic windows of  $F_{ST}$  (a) and copy-number ratio (b) and plot the number of windows in each bin. Tail cutoffs of 1, 2.5 and 5% are indicated in each panel.
