# Supplementary material for: Genomic Differentiation Between Temperate and Tropical Australian Populations ofDrosophila melanogaster
Source: Oxford University Press journal article supplement (doi:10.1534/genetics.110.123059), 2010-11-09
Supplement: figures2.pdf [file figures2.pdf]

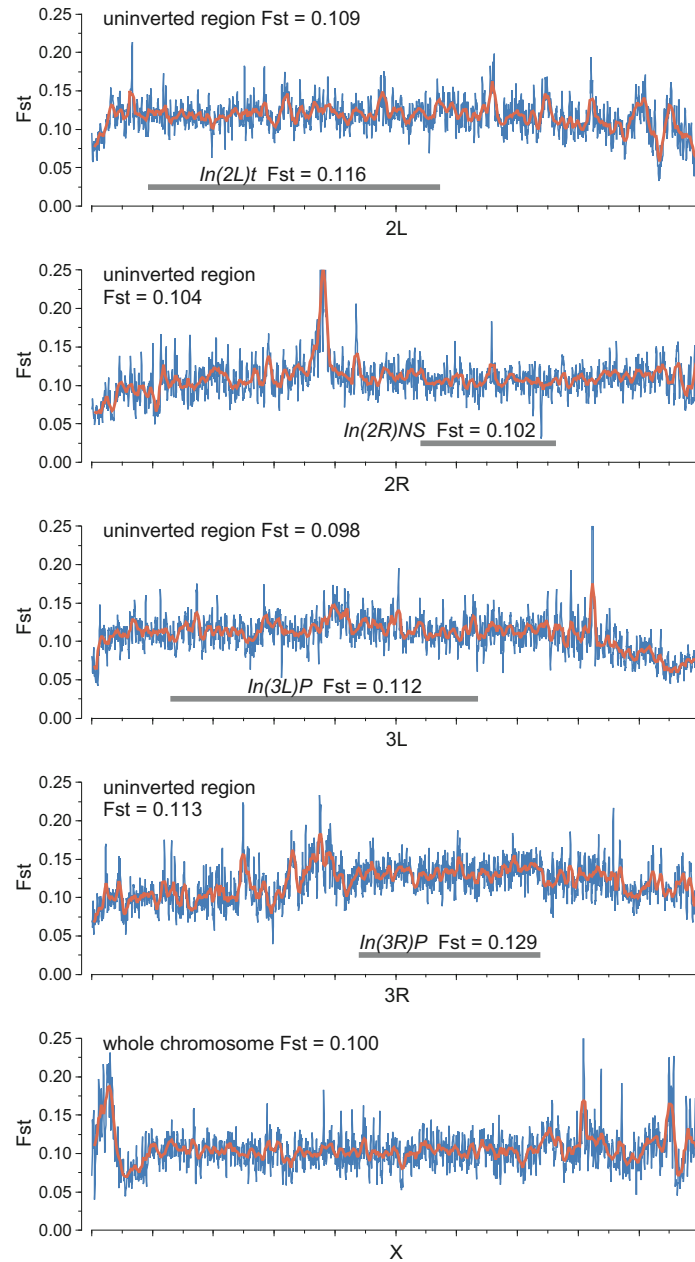

FIGURE S2.—We plot  $F_{ST}$  for standard and inverted regions of each chromosome arm. Inverted regions are indicated by gray horizontal lines. Blue series indicate average  $F_{ST}$  values over 25kb windows slid every 10kb; red lines show 200kb windows slid 50kb at a time. Overall  $F_{ST}$  across each region (standardvs. inverted) is also indicated in each panel. Note that there is no inversion on the X chromosome.
