# Supplementary material for: Genomic Differentiation Between Temperate and Tropical Australian Populations ofDrosophila melanogaster
Source: Oxford University Press journal article supplement (doi:10.1534/genetics.110.123059), 2010-11-09
Supplement: figures3.pdf [file figures3.pdf]

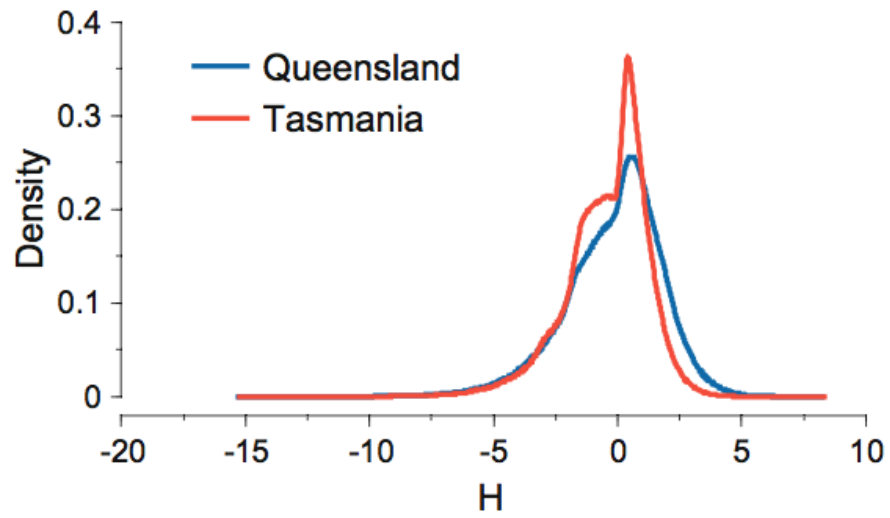

FIGURE S3.—A comparison of the distributions of H statistics computed in 1kb windows in both the Queensland and the Tasmanian samples. This is a modified version of Fay and Wu's H which excludes singleton variants. See main text for details. The medians of these distributions are significantly different from one another in a Wilcoxon rank sum test ( $p < 2.2 \times 10^{-16}$ ).
