# Supplementary material for: Genomic Differentiation Between Temperate and Tropical Australian Populations ofDrosophila melanogaster
Source: Oxford University Press journal article supplement (doi:10.1534/genetics.110.123059), 2010-11-09
Supplement: figures4.pdf [file figures4.pdf]

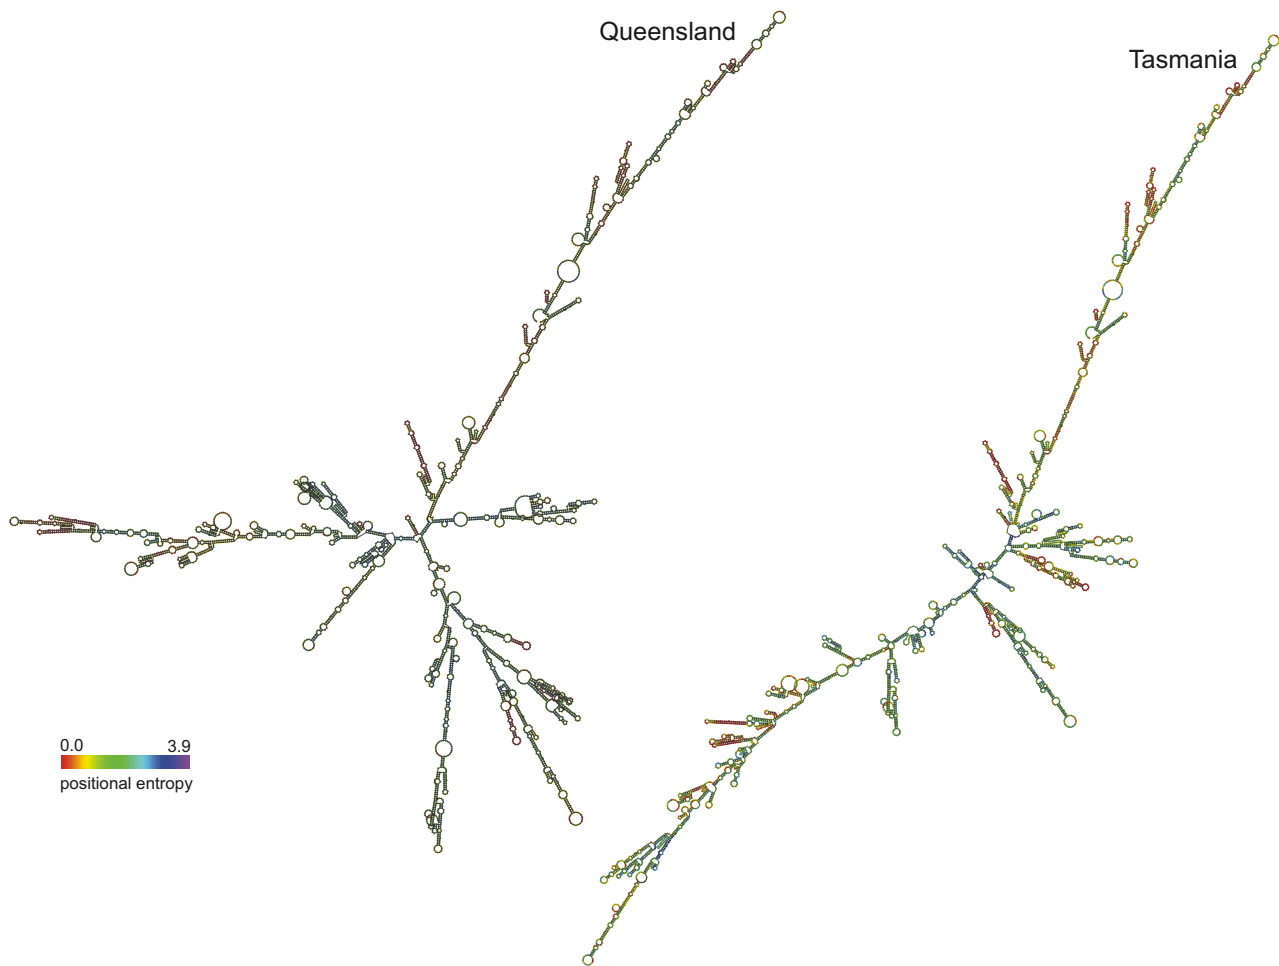

FIGURE S4.—Fixed differences between Queensland and Tasmania at the *Irc* gene radically alter pre-mRNA structure. Computationally-inferred secondary structure of *Irc* pre-mRNA is shown for Queensland and Tasmania alleles.
