# Supplementary material for: Genomic Differentiation Between Temperate and Tropical Australian Populations ofDrosophila melanogaster
Source: Oxford University Press journal article supplement (doi:10.1534/genetics.110.123059), 2010-11-09
Supplement: tables1.pdf [file tables1.pdf]

TABLE S1

We report average polymorphism per 1kb ( $\pi$ ) and Fay and Wu's  $H$  for each population, as well as mean  $F_{ST}$  and size of highly-differentiated genomic regions for the normally-recombining portion of each chromosome arm.

| chromosome | $\pi$      |          | Fay and Wu's $H$ |          | $F_{ST}$ | differentiated region size |
|------------|------------|----------|------------------|----------|----------|----------------------------|
|            | Queensland | Tasmania | Queensland       | Tasmania |          |                            |
| 2L         | 5.060      | 3.146    | -0.108           | -0.500   | 0.116    | 2206                       |
| 2R         | 4.905      | 3.284    | -0.272           | -0.428   | 0.107    | 2507                       |
| 3L         | 5.051      | 3.130    | -0.125           | -0.426   | 0.111    | 2013                       |
| 3R         | 5.010      | 3.117    | 0.043            | -0.442   | 0.124    | 3295                       |
| X          | 2.926      | 2.121    | -0.500           | -0.456   | 0.097    | 1899                       |
