# Supplementary material for: Genomic Differentiation Between Temperate and Tropical Australian Populations ofDrosophila melanogaster
Source: Oxford University Press journal article supplement (doi:10.1534/genetics.110.123059), 2010-11-09
Supplement: tables2.pdf [file tables2.pdf]

**TABLE S2****Genes in the top 2.5% of 3'UTR differentiation.**

| Gene ID     | 3'UTR $F_{ST}$ | Gene Name | Gene ID     | 3'UTR $F_{ST}$ | Gene Name |
|-------------|----------------|-----------|-------------|----------------|-----------|
| FBgn0038783 | 0.692282       | CG4367    | FBgn0035028 | 0.341374       | Start1    |
| FBgn0038827 | 0.66719        | Fancd2    | FBgn0259680 | 0.337828       | Pkcdelta  |
| FBgn0033809 | 0.620316       | CG4630    | FBgn0031681 | 0.337809       | pgant5    |
| FBgn0033808 | 0.620316       | CG4627    | FBgn0031861 | 0.335605       | CG17375   |
| FBgn0038225 | 0.596327       | soti      | FBgn0051320 | 0.334101       | CG31320   |
| FBgn0031491 | 0.561771       | alpha4GT1 | FBgn0038223 | 0.334016       | CG8538    |
| FBgn0038652 | 0.544105       | CG7720    | FBgn0259984 | 0.333621       | kuz       |
| FBgn0032974 | 0.532426       | CG3651    | FBgn0034820 | 0.331211       | CG13538   |
| FBgn0039396 | 0.523533       | CcapR     | FBgn0011289 | 0.327801       | TfIIA-L   |
| FBgn0038478 | 0.521974       | cal1      | FBgn0016054 | 0.32776        | phr6-4    |
| FBgn0038292 | 0.515821       | CG3987    | FBgn0024832 | 0.326232       | AP-50     |
| FBgn0032409 | 0.469866       | Ced-12    | FBgn0019968 | 0.32613        | Khc-73    |
| FBgn0032520 | 0.468198       | CG10859   | FBgn0031619 | 0.321426       | CG3355    |
| FBgn0032318 | 0.458057       | CG14072   | FBgn0085374 | 0.320338       | CG34345   |
| FBgn0010441 | 0.446403       | pll       | FBgn0032515 | 0.319843       | loqs      |
| FBgn0038124 | 0.436888       | CG14380   | FBgn0031752 | 0.317964       | CG9044    |
| FBgn0032465 | 0.430473       | CG12404   | FBgn0024432 | 0.317639       | Dlc90F    |
| FBgn0023415 | 0.426255       | Acp32CD   | FBgn0053092 | 0.317186       | CG33092   |
| FBgn0031284 | 0.424294       | CG3876    | FBgn0029161 | 0.316588       | slmo      |
| FBgn0039049 | 0.421011       | CG6726    | FBgn0085208 | 0.316588       | CG34179   |
| FBgn0020368 | 0.419943       | Vha68-1   | FBgn0035370 | 0.315363       | CG1240    |
| FBgn0043471 | 0.418173       | kappaTry  | FBgn0033128 | 0.315135       | Tsp42Eg   |
| FBgn0004888 | 0.41782        | Scsalpha  | FBgn0046776 | 0.31513        | CG14033   |
| FBgn0042710 | 0.414471       | Hex-t2    | FBgn0050050 | 0.314525       | CG30050   |
| FBgn0010222 | 0.399271       | Nmdmc     | FBgn0011244 | 0.313799       | Hsp60B    |
| FBgn0024947 | 0.395613       | NTPase    | FBgn0259966 | 0.311797       | Sfp51E    |
| FBgn0038819 | 0.393874       | Cpr92F    | FBgn0028482 | 0.3112         | CG16857   |
| FBgn0039061 | 0.384126       | Ir        | FBgn0050043 | 0.307662       | CG30043   |
| FBgn0050021 | 0.374556       | skf       | FBgn0033304 | 0.307415       | Cyp6a13   |
| FBgn0039293 | 0.369886       | CG11851   | FBgn0039969 | 0.306813       | Fis1      |
| FBgn0003248 | 0.36957        | Rh2       | FBgn0032474 | 0.302561       | DnaJ-H    |
| FBgn0026576 | 0.362997       | CG5991    | FBgn0039107 | 0.301822       | CG10300   |
| FBgn0014141 | 0.362454       | cher      | FBgn0040397 | 0.30087        | CG3655    |
| FBgn0031529 | 0.36213        | CG9662    | FBgn0020767 | 0.300498       | Spred     |
| FBgn0026758 | 0.356538       | Trf2      | FBgn0033806 | 0.300339       | CG4616    |
| FBgn0038815 | 0.354985       | CG5466    | FBgn0022073 | 0.299715       | Thor      |
| FBgn0086677 | 0.354284       | jeb       | FBgn0032763 | 0.297223       | CG17568   |
| FBgn0034263 | 0.353819       | CG10934   | FBgn0013433 | 0.296955       | beat-Ia   |
| FBgn0039238 | 0.352161       | CG7016    | FBgn0033252 | 0.296132       | CG12769   |

|             |          |         |  |             |          |        |
|-------------|----------|---------|--|-------------|----------|--------|
| FBgn0039239 | 0.352161 | CG13641 |  | FBgn0038407 | 0.296092 | CG6126 |
| FBgn0031522 | 0.344939 | CG3285  |  | FBgn0015844 | 0.295943 | Xpd    |

---

We calculated the mean  $F_{ST}$  of each gene's 3'UTR region and list the top 2.5%.
