# Supplementary material for: Genomic Differentiation Between Temperate and Tropical Australian Populations ofDrosophila melanogaster
Source: Oxford University Press journal article supplement (doi:10.1534/genetics.110.123059), 2010-11-09
Supplement: tables3.pdf [file tables3.pdf]

TABLE S3

Genes in the top 2.5% of whole-gene nonsynonymous  $F_{ST}$  differentiation.

| Gene ID     | Nonsyn $F_{ST}$ | Gene Name | Gene ID     | Nonsyn $F_{ST}$ | Gene Name    |
|-------------|-----------------|-----------|-------------|-----------------|--------------|
| FBgn0031345 | 0.440546        | CG18132   | FBgn0035687 | 0.261204        | CG13296      |
| FBgn0086677 | 0.432406        | jeb       | FBgn0051380 | 0.260273        | CG31380      |
| FBgn0034288 | 0.41522         | CG5084    | FBgn0035216 | 0.257985        | CG9168       |
| FBgn0032331 | 0.401399        | CG14913   | FBgn0031321 | 0.255153        | Tgt          |
| FBgn0033093 | 0.38458         | CG3270    | FBgn0036951 | 0.255088        | CG7017       |
| FBgn0033697 | 0.384211        | Cyp6t3    | FBgn0039413 | 0.254965        | CG14556      |
| FBgn0053339 | 0.381734        | CG33339   | FBgn0025676 | 0.254259        | CkIIalpha-i3 |
| FBgn0053205 | 0.376138        | CG33205   | FBgn0260011 | 0.254035        | nimC4        |
| FBgn0035276 | 0.37592         | CG12022   | FBgn0021764 | 0.253939        | sdk          |
| FBgn0029173 | 0.373758        | fu2       | FBgn0038195 | 0.253804        | CG3061       |
| FBgn0051082 | 0.372544        | CG31082   | FBgn0003486 | 0.2534          | spo          |
| FBgn0025621 | 0.372522        | CG16989   | FBgn0036593 | 0.253169        | CG13048      |
| FBgn0085401 | 0.367414        | CG34372   | FBgn0051265 | 0.252429        | CG31265      |
| FBgn0011285 | 0.352576        | S6kII     | FBgn0035268 | 0.251505        | CG8001       |
| FBgn0051851 | 0.338734        | CG31851   | FBgn0031975 | 0.248371        | Tg           |
| FBgn0066101 | 0.331073        | LpR1      | FBgn0052104 | 0.248324        | CG32104      |
| FBgn0045476 | 0.329101        | Gr64e     | FBgn0039167 | 0.248287        | CG17786      |
| FBgn0015905 | 0.328591        | ast       | FBgn0031739 | 0.247517        | CG14005      |
| FBgn0035313 | 0.328007        | CG13810   | FBgn0032843 | 0.247437        | CG10730      |
| FBgn0085449 | 0.325412        | CG34420   | FBgn0015230 | 0.246036        | Glut3        |
| FBgn0003861 | 0.324953        | trp       | FBgn0034295 | 0.245982        | CG10911      |
| FBgn0051205 | 0.319649        | CG31205   | FBgn0052154 | 0.245111        | CG32154      |
| FBgn0039183 | 0.316728        | Dis3      | FBgn0033473 | 0.244758        | CG12128      |
| FBgn0038144 | 0.316311        | CG8870    | FBgn0028482 | 0.244381        | CG16857      |
| FBgn0052549 | 0.31354         | CG32549   | FBgn0033742 | 0.244029        | CG8550       |
| FBgn0038153 | 0.311496        | Ir87a     | FBgn0031782 | 0.243645        | WDR79        |
| FBgn0039528 | 0.310709        | dsd       | FBgn0039079 | 0.243057        | Ir94g        |
| FBgn0036541 | 0.306629        | CG12486   | FBgn0036320 | 0.242916        | CG10943      |
| FBgn0040045 | 0.305202        | CG12460   | FBgn0028852 | 0.242757        | CG15262      |
| FBgn0038139 | 0.304808        | CG8795    | FBgn0038125 | 0.242423        | CG8141       |
| FBgn0031195 | 0.304405        | CG17600   | FBgn0039201 | 0.242182        | CG13617      |
| FBgn0065035 | 0.30298         | AlkB      | FBgn0037989 | 0.24141         | CG14741      |
| FBgn0034513 | 0.296861        | CG13423   | FBgn0043796 | 0.241249        | CG12219      |
| FBgn0038550 | 0.296205        | CG17801   | FBgn0035918 | 0.241212        | Cdc6         |
| FBgn0036249 | 0.294651        | CG11560   | FBgn0037817 | 0.240972        | Cyp12e1      |
| FBgn0020272 | 0.29456         | mst       | FBgn0034422 | 0.240814        | CG7137       |
| FBgn0032045 | 0.291513        | CG13087   | FBgn0036503 | 0.240784        | CG13454      |
| FBgn0085213 | 0.290632        | CG34184   | FBgn0036952 | 0.239612        | CG6933       |
| FBgn0052751 | 0.290399        | CG32751   | FBgn0039067 | 0.23927         | wda          |

|             |          |                       |             |          |           |
|-------------|----------|-----------------------|-------------|----------|-----------|
| FBgn0038238 | 0.290022 | CG14854               | FBgn0085481 | 0.238273 | CG34452   |
| FBgn0032066 | 0.289623 | CG9463                | FBgn0043005 | 0.23733  | CG10251   |
| FBgn0053503 | 0.288901 | Cyp12d1-d             | FBgn0039227 | 0.237257 | polybromo |
| FBgn0041607 | 0.288162 | asparagine-synthetase | FBgn0045487 | 0.236246 | Gr36a     |
| FBgn0260466 | 0.287405 | Indy-2                | FBgn0260873 | 0.236107 | CG42583   |
| FBgn0026737 | 0.286948 | CG6171                | FBgn0032370 | 0.236036 | CG12307   |
| FBgn0051005 | 0.286607 | CG31005               | FBgn0020640 | 0.235496 | Lcp65Ae   |
| FBgn0053012 | 0.285977 | CG33012               | FBgn0010328 | 0.234114 | woc       |
| FBgn0030946 | 0.284422 | CG6659                | FBgn0085253 | 0.233799 | CG34224   |
| FBgn0085305 | 0.282863 | CG34276               | FBgn0030054 | 0.233653 | Caf1-180  |
| FBgn0030752 | 0.282683 | CG9947                | FBgn0038133 | 0.232298 | Osi22     |
| FBgn0038850 | 0.280486 | CG17279               | FBgn0039684 | 0.231514 | Obp99d    |
| FBgn0039246 | 0.279792 | CG10845               | FBgn0030033 | 0.230891 | CG1387    |
| FBgn0033599 | 0.279459 | CG13223               | FBgn0033443 | 0.230715 | CG1698    |
| FBgn0036948 | 0.277711 | CG7298                | FBgn0039343 | 0.230581 | CG5111    |
| FBgn0259199 | 0.277513 | CG42303               | FBgn0035970 | 0.230459 | CG4483    |
| FBgn0025866 | 0.277104 | CalpB                 | FBgn0039467 | 0.230335 | CG14253   |
| FBgn0039083 | 0.276633 | CG10177               | FBgn0035771 | 0.229884 | sec63     |
| FBgn0032803 | 0.275137 | CG13082               | FBgn0038912 | 0.229665 | CG6656    |
| FBgn0033186 | 0.275072 | CG1602                | FBgn0033698 | 0.229018 | CG8858    |
| FBgn0040391 | 0.273132 | CG2854                | FBgn0014469 | 0.228657 | Cyp4e2    |
| FBgn0052107 | 0.271473 | CG32107               | FBgn0031961 | 0.227479 | CG7102    |
| FBgn0033187 | 0.27141  | CG2144                | FBgn0046689 | 0.227113 | Takl1     |
| FBgn0051251 | 0.268618 | CG31251               | FBgn0054041 | 0.226485 | CG34041   |
| FBgn0051461 | 0.267248 | CG31461               | FBgn0034141 | 0.22639  | CG8311    |
| FBgn0085341 | 0.265634 | CG34312               | FBgn0033850 | 0.226218 | CG13331   |
| FBgn0036193 | 0.265447 | CG14135               | FBgn0032142 | 0.225804 | CG13120   |
| FBgn0051099 | 0.265062 | CG31099               | FBgn0037533 | 0.225779 | CD98hc    |
| FBgn0036062 | 0.264058 | CG6685                | FBgn0039080 | 0.225681 | Ir94h     |
| FBgn0032484 | 0.263439 | kek4                  | FBgn0031817 | 0.225339 | CG9531    |
| FBgn0013949 | 0.262919 | Ela                   | FBgn0037248 | 0.225186 | Spargel   |
| FBgn0033289 | 0.262138 | CG2121                | FBgn0031429 | 0.224589 | CG15393   |
| FBgn0032602 | 0.26173  | CG13278               |             |          |           |

---

We calculated the mean nonsynonymous  $F_{ST}$  of each gene and list the top 2.5%
