# Supplementary material for: Genomic Differentiation Between Temperate and Tropical Australian Populations ofDrosophila melanogaster
Source: Oxford University Press journal article supplement (doi:10.1534/genetics.110.123059), 2010-11-09
Supplement: tables4.pdf [file tables4.pdf]

**TABLE S4****Genes in the top 2.5% of individual-domain nonsynonymous  $F_{ST}$  differentiation.**

| Gene ID     | Gene Name | Domain          | Nonsyn $F_{ST}$ |
|-------------|-----------|-----------------|-----------------|
| FBgn0033093 | CG3270    | DAO             | 0.38458         |
| FBgn0038260 | CG14855   | MFS_1           | 0.384254        |
| FBgn0033697 | Cyp6t3    | p450            | 0.384211        |
| FBgn0034295 | CG10911   | DUF725          | 0.360936        |
| FBgn0051380 | CG31380   | APH             | 0.342056        |
| FBgn0003510 | Sry-alpha | Serendipity_A   | 0.33336         |
| FBgn0045476 | Gr64e     | 7tm_7           | 0.329101        |
| FBgn0051205 | CG31205   | Trypsin         | 0.319649        |
| FBgn0032602 | CG13278   | ASC             | 0.298351        |
| FBgn0034513 | CG13423   | Peptidase_C1_2  | 0.296861        |
| FBgn0085213 | CG34184   | DM4_12          | 0.290632        |
| FBgn0260466 | Indy-2    | Na_sulph_symp   | 0.287405        |
| FBgn0030946 | CG6659    | Dpy19           | 0.284422        |
| FBgn0030752 | CG9947    | CDC50           | 0.282683        |
| FBgn0038850 | CG17279   | JHBP            | 0.280486        |
| FBgn0028852 | CG15262   | NOT2_3_5        | 0.278706        |
| FBgn0020377 | Sr-CII    | MAM             | 0.27817         |
| FBgn0031305 | Iris      | DUF3610         | 0.27248         |
| FBgn0033443 | CG1698    | SNF             | 0.268159        |
| FBgn0051099 | CG31099   | DUF227          | 0.265062        |
| FBgn0021764 | sdk       | fn3             | 0.263057        |
| FBgn0032066 | CG9463    | Glyco_hydro_38C | 0.258052        |
| FBgn0038005 | Cyp313a5  | p450            | 0.257784        |
| FBgn0003486 | spo       | p450            | 0.2534          |
| FBgn0038465 | Irc       | An_peroxidase   | 0.247982        |
| FBgn0054005 | CG34005   | DUF725          | 0.242942        |
| FBgn0038541 | TyrRII    | 7tm_1           | 0.239625        |
| FBgn0054049 | CG34049   | CAP             | 0.237954        |
| FBgn0045487 | Gr36a     | 7tm_7           | 0.236246        |

We calculated the mean nonsynonymous  $F_{ST}$  of each PFam domain in each gene and took the most-differentiated domain as that gene's representative domain. We list the top 2.5% of individual-domain differentiated genes.
