# Supplementary material for: Genomic Differentiation Between Temperate and Tropical Australian Populations ofDrosophila melanogaster
Source: Oxford University Press journal article supplement (doi:10.1534/genetics.110.123059), 2010-11-09
Supplement: tables5.pdf [file tables5.pdf]

**TABLE S5****Significantly-enriched Gene Ontology categories in top 2.5% 1kb  $F_{ST}$  regions.**

| <b>Biological Process</b> |          |                                                       |
|---------------------------|----------|-------------------------------------------------------|
| GO accession              | P-value  | Description                                           |
| GO:0007424                | 2.49E-09 | open tracheal system development                      |
| GO:0007428                | 1.56E-06 | primary branching, open tracheal system               |
| GO:0007165                | 1.56E-06 | signal transduction                                   |
| GO:0007427                | 1.56E-06 | epithelial cell migration, open tracheal system       |
| GO:0002121                | 2.21E-06 | inter-male aggressive behavior                        |
| GO:0007509                | 2.62E-06 | mesoderm migration                                    |
| GO:0042051                | 2.62E-06 | compound eye photoreceptor development                |
| GO:0006355                | 3.91E-06 | regulation of transcription, DNA-dependent            |
| GO:0007156                | 1.37E-05 | homophilic cell adhesion                              |
| GO:0048477                | 1.78E-05 | oogenesis                                             |
| GO:0007435                | 1.78E-05 | salivary gland morphogenesis                          |
| GO:0007507                | 1.82E-05 | heart development                                     |
| GO:0008543                | 2.13E-05 | fibroblast growth factor receptor signaling pathway   |
| GO:0035152                | 4.50E-05 | regulation of tube architecture, open tracheal system |
| GO:0007614                | 8.48E-05 | short-term memory                                     |
| GO:0006816                | 8.48E-05 | calcium ion transport                                 |
| GO:0007431                | 1.54E-04 | salivary gland development                            |
| GO:0007155                | 1.70E-04 | cell adhesion                                         |
| GO:0016044                | 2.50E-04 | membrane organization                                 |
| GO:0007293                | 4.51E-04 | germarium-derived egg chamber formation               |
| GO:0007411                | 4.51E-04 | axon guidance                                         |
| GO:0042048                | 4.51E-04 | olfactory behavior                                    |
| GO:0030707                | 4.51E-04 | ovarian follicle cell development                     |
| GO:0008101                | 4.87E-04 | decapentaplegic receptor signaling pathway            |
| GO:0045570                | 4.87E-04 | regulation of imaginal disc growth                    |
| GO:0035172                | 4.87E-04 | hemocyte proliferation                                |
| GO:0007443                | 4.88E-04 | Malpighian tubule morphogenesis                       |
| GO:0048813                | 4.88E-04 | dendrite morphogenesis                                |
| GO:0048190                | 5.67E-04 | wing disc dorsal/ventral pattern formation            |
| GO:0007422                | 7.20E-04 | peripheral nervous system development                 |
| GO:0016055                | 7.20E-04 | Wnt receptor signaling pathway                        |
| GO:0007611                | 7.20E-04 | learning or memory                                    |
| GO:0007426                | 1.12E-03 | tracheal outgrowth, open tracheal system              |
| GO:0006813                | 1.21E-03 | potassium ion transport                               |
| GO:0007517                | 1.32E-03 | muscle organ development                              |
| GO:0048066                | 1.52E-03 | pigmentation during development                       |
| GO:0007297                | 1.52E-03 | ovarian follicle cell migration                       |
| GO:0048675                | 1.52E-03 | axon extension                                        |

|            |          |                                                                  |
|------------|----------|------------------------------------------------------------------|
| GO:0006811 | 1.67E-03 | ion transport                                                    |
| GO:0007476 | 1.68E-03 | imaginal disc-derived wing morphogenesis                         |
| GO:0030718 | 1.72E-03 | germ-line stem cell maintenance                                  |
| GO:0007619 | 2.08E-03 | courtship behavior                                               |
| GO:0045449 | 2.19E-03 | regulation of transcription                                      |
| GO:0007379 | 2.38E-03 | segment specification                                            |
| GO:0007417 | 3.00E-03 | central nervous system development                               |
| GO:0007399 | 3.00E-03 | nervous system development                                       |
| GO:0030097 | 3.15E-03 | hemopoiesis                                                      |
| GO:0007274 | 3.15E-03 | neuromuscular synaptic transmission                              |
| GO:0007265 | 3.15E-03 | Ras protein signal transduction                                  |
| GO:0042078 | 3.15E-03 | germ-line stem cell division                                     |
| GO:0016199 | 3.46E-03 | axon midline choice point recognition                            |
| GO:0007602 | 3.46E-03 | phototransduction                                                |
| GO:0048666 | 3.54E-03 | neuron development                                               |
| GO:0008355 | 3.91E-03 | olfactory learning                                               |
| GO:0008407 | 4.18E-03 | bristle morphogenesis                                            |
| GO:0016477 | 4.18E-03 | cell migration                                                   |
| GO:0016339 | 4.96E-03 | calcium-dependent cell-cell adhesion                             |
| GO:0055085 | 5.47E-03 | transmembrane transport                                          |
| GO:0008063 | 5.77E-03 | Toll signaling pathway                                           |
| GO:0008354 | 5.77E-03 | germ cell migration                                              |
| GO:0006357 | 6.28E-03 | regulation of transcription from RNA polymerase II promoter      |
| GO:0035147 | 6.60E-03 | branch fusion, open tracheal system                              |
| GO:0008344 | 6.60E-03 | adult locomotory behavior                                        |
| GO:0009953 | 6.60E-03 | dorsal/ventral pattern formation                                 |
| GO:0035277 | 6.60E-03 | spiracle morphogenesis, open tracheal system                     |
| GO:0006325 | 6.93E-03 | chromatin organization                                           |
| GO:0007494 | 6.93E-03 | midgut development                                               |
| GO:0002009 | 6.93E-03 | morphogenesis of an epithelium                                   |
| GO:0006468 | 8.66E-03 | protein amino acid phosphorylation                               |
| GO:0019991 | 8.81E-03 | septate junction assembly                                        |
| GO:0007442 | 8.81E-03 | hindgut morphogenesis                                            |
| GO:0007291 | 8.81E-03 | sperm individualization                                          |
| GO:0007294 | 8.81E-03 | germarium-derived oocyte fate determination                      |
| GO:0035071 | 9.76E-03 | salivary gland cell autophagic cell death                        |
| GO:0007298 | 9.76E-03 | border follicle cell migration                                   |
| GO:0008104 | 1.11E-02 | protein localization                                             |
| GO:0000381 | 1.11E-02 | regulation of alternative nuclear mRNA splicing, via spliceosome |
| GO:0017148 | 1.11E-02 | negative regulation of translation                               |
| GO:0051225 | 1.11E-02 | spindle assembly                                                 |

|            |          |                                                                      |
|------------|----------|----------------------------------------------------------------------|
| GO:0001745 | 1.11E-02 | compound eye morphogenesis                                           |
| GO:0008360 | 1.12E-02 | regulation of cell shape                                             |
| GO:0007391 | 1.18E-02 | dorsal closure                                                       |
| GO:0007498 | 1.35E-02 | mesoderm development                                                 |
| GO:0007179 | 1.42E-02 | transforming growth factor beta receptor signaling pathway           |
| GO:0007350 | 1.42E-02 | blastoderm segmentation                                              |
| GO:0016481 | 1.45E-02 | negative regulation of transcription                                 |
| GO:0001700 | 1.49E-02 | embryonic development via the syncytial blastoderm                   |
| GO:0007409 | 1.79E-02 | axonogenesis                                                         |
| GO:0030162 | 1.80E-02 | regulation of proteolysis                                            |
| GO:0048749 | 1.95E-02 | compound eye development                                             |
| GO:0007018 | 1.95E-02 | microtubule-based movement                                           |
| GO:0007268 | 1.98E-02 | synaptic transmission                                                |
| GO:0007275 | 2.04E-02 | multicellular organismal development                                 |
| GO:0035023 | 2.20E-02 | regulation of Rho protein signal transduction                        |
| GO:0007367 | 2.20E-02 | segment polarity determination                                       |
| GO:0006911 | 2.50E-02 | phagocytosis, engulfment                                             |
| GO:0048102 | 2.57E-02 | autophagic cell death                                                |
| GO:0009987 | 2.72E-02 | cellular process                                                     |
| GO:0006096 | 2.82E-02 | glycolysis                                                           |
| GO:0016318 | 3.31E-02 | ommatidial rotation                                                  |
| GO:0008045 | 3.31E-02 | motor axon guidance                                                  |
| GO:0030036 | 3.80E-02 | actin cytoskeleton organization                                      |
| GO:0046843 | 3.82E-02 | dorsal appendage formation                                           |
| GO:0045475 | 3.82E-02 | locomotor rhythm                                                     |
| GO:0006342 | 3.82E-02 | chromatin silencing                                                  |
| GO:0051726 | 3.82E-02 | regulation of cell cycle                                             |
| GO:0007474 | 3.82E-02 | imaginal disc-derived wing vein specification                        |
| GO:0006350 | 3.82E-02 | transcription                                                        |
| GO:0007186 | 4.03E-02 | G-protein coupled receptor protein signaling pathway                 |
| GO:0000122 | 4.78E-02 | negative regulation of transcription from RNA polymerase II promoter |

### Molecular Function

| GO accession | P-value  | Description                                                         |
|--------------|----------|---------------------------------------------------------------------|
| GO:0005515   | 1.57E-08 | protein binding                                                     |
| GO:0003700   | 8.12E-07 | transcription factor activity                                       |
| GO:0005509   | 1.93E-04 | calcium ion binding                                                 |
| GO:0004889   | 3.64E-04 | nicotinic acetylcholine-activated cation-selective channel activity |
| GO:0003729   | 3.64E-04 | mRNA binding                                                        |
| GO:0003702   | 3.64E-04 | RNA polymerase II transcription factor activity                     |
| GO:0004871   | 3.64E-04 | signal transducer activity                                          |

|            |          |                                                          |
|------------|----------|----------------------------------------------------------|
| GO:0043565 | 8.02E-04 | sequence-specific DNA binding                            |
| GO:0008188 | 1.87E-03 | neuropeptide receptor activity                           |
| GO:0003704 | 1.89E-03 | specific RNA polymerase II transcription factor activity |
| GO:0003777 | 3.08E-03 | microtubule motor activity                               |
| GO:0005096 | 5.38E-03 | GTPase activator activity                                |
| GO:0016566 | 5.92E-03 | specific transcriptional repressor activity              |
| GO:0016563 | 6.18E-03 | transcription activator activity                         |
| GO:0005249 | 7.73E-03 | voltage-gated potassium channel activity                 |
| GO:0003723 | 8.11E-03 | RNA binding                                              |
| GO:0003779 | 9.12E-03 | actin binding                                            |
| GO:0004888 | 1.02E-02 | transmembrane receptor activity                          |
| GO:0005085 | 1.02E-02 | guanyl-nucleotide exchange factor activity               |
| GO:0008270 | 1.20E-02 | zinc ion binding                                         |
| GO:0003676 | 1.27E-02 | nucleic acid binding                                     |
| GO:0003730 | 1.64E-02 | mRNA 3'-UTR binding                                      |
| GO:0000166 | 1.68E-02 | nucleotide binding                                       |
| GO:0016251 | 2.52E-02 | general RNA polymerase II transcription factor activity  |
| GO:0016887 | 2.52E-02 | ATPase activity                                          |
| GO:0004725 | 2.97E-02 | protein tyrosine phosphatase activity                    |
| GO:0005089 | 3.17E-02 | Rho guanyl-nucleotide exchange factor activity           |
| GO:0005524 | 3.65E-02 | ATP binding                                              |
| GO:0004674 | 3.67E-02 | protein serine/threonine kinase activity                 |
| GO:0042623 | 3.67E-02 | ATPase activity, coupled                                 |
| GO:0005102 | 3.67E-02 | receptor binding                                         |
| GO:0004930 | 4.02E-02 | G-protein coupled receptor activity                      |
| GO:0005516 | 4.16E-02 | calmodulin binding                                       |
| GO:0003713 | 4.98E-02 | transcription coactivator activity                       |

---

Reported P-values are corrected for a false-discovery rate of 0.05.
