# Supplementary material for: Genomic Differentiation Between Temperate and Tropical Australian Populations ofDrosophila melanogaster
Source: Oxford University Press journal article supplement (doi:10.1534/genetics.110.123059), 2010-11-09
Supplement: tables6.pdf [file tables6.pdf]

TABLE S6

**Significantly-enriched Gene Ontology categories in top 1% 1kb copy-number variable (CNV) regions.**

| <b>Biological Process</b> |          |                                                      |
|---------------------------|----------|------------------------------------------------------|
| GO accession              | P-value  | Description                                          |
| GO:0006355                | 3.58E-10 | regulation of transcription, DNA-dependent           |
| GO:0007417                | 1.10E-08 | central nervous system development                   |
| GO:0045449                | 6.87E-08 | regulation of transcription                          |
| GO:0007507                | 3.73E-06 | heart development                                    |
| GO:0007155                | 1.98E-05 | cell adhesion                                        |
| GO:0008585                | 3.54E-05 | female gonad development                             |
| GO:0006813                | 3.81E-05 | potassium ion transport                              |
| GO:0048477                | 1.20E-04 | oogenesis                                            |
| GO:0001700                | 1.55E-04 | embryonic development via the syncytial blastoderm   |
| GO:0007399                | 5.02E-04 | nervous system development                           |
| GO:0007304                | 5.70E-04 | chorion-containing eggshell formation                |
| GO:0007619                | 5.97E-04 | courtship behavior                                   |
| GO:0008587                | 7.14E-04 | imaginal disc-derived wing margin morphogenesis      |
| GO:0007411                | 7.35E-04 | axon guidance                                        |
| GO:0007186                | 8.06E-04 | G-protein coupled receptor protein signaling pathway |
| GO:0007494                | 8.06E-04 | midgut development                                   |
| GO:0007480                | 9.94E-04 | imaginal disc-derived leg morphogenesis              |
| GO:0007165                | 1.03E-03 | signal transduction                                  |
| GO:0007476                | 1.03E-03 | imaginal disc-derived wing morphogenesis             |
| GO:0008360                | 1.03E-03 | regulation of cell shape                             |
| GO:0045475                | 1.33E-03 | locomotor rhythm                                     |
| GO:0007422                | 1.39E-03 | peripheral nervous system development                |
| GO:0007224                | 1.53E-03 | smoothened signaling pathway                         |
| GO:0048190                | 1.72E-03 | wing disc dorsal/ventral pattern formation           |
| GO:0042048                | 1.80E-03 | olfactory behavior                                   |
| GO:0002121                | 1.86E-03 | inter-male aggressive behavior                       |
| GO:0007623                | 1.95E-03 | circadian rhythm                                     |
| GO:0008354                | 1.95E-03 | germ cell migration                                  |
| GO:0008104                | 2.26E-03 | protein localization                                 |
| GO:0007455                | 2.51E-03 | eye-antennal disc morphogenesis                      |
| GO:0035023                | 2.87E-03 | regulation of Rho protein signal transduction        |
| GO:0016318                | 2.87E-03 | ommatidial rotation                                  |
| GO:0007400                | 2.87E-03 | neuroblast fate determination                        |
| GO:0007015                | 2.96E-03 | actin filament organization                          |
| GO:0008285                | 3.38E-03 | negative regulation of cell proliferation            |
| GO:0009987                | 5.31E-03 | cellular process                                     |
| GO:0006911                | 5.79E-03 | phagocytosis, engulfment                             |

|            |          |                                                                      |
|------------|----------|----------------------------------------------------------------------|
| GO:0016321 | 8.07E-03 | female meiosis chromosome segregation                                |
| GO:0009790 | 8.83E-03 | embryonic development                                                |
| GO:0007419 | 8.83E-03 | ventral cord development                                             |
| GO:0048749 | 8.83E-03 | compound eye development                                             |
| GO:0007268 | 9.23E-03 | synaptic transmission                                                |
| GO:0007517 | 9.23E-03 | muscle organ development                                             |
| GO:0007163 | 9.23E-03 | establishment or maintenance of cell polarity                        |
| GO:0008407 | 9.23E-03 | bristle morphogenesis                                                |
| GO:0016567 | 9.23E-03 | protein ubiquitination                                               |
| GO:0007498 | 1.17E-02 | mesoderm development                                                 |
| GO:0006508 | 1.17E-02 | proteolysis                                                          |
| GO:0006366 | 1.32E-02 | transcription from RNA polymerase II promoter                        |
| GO:0016481 | 1.32E-02 | negative regulation of transcription                                 |
| GO:0007423 | 1.34E-02 | sensory organ development                                            |
| GO:0006350 | 1.42E-02 | transcription                                                        |
| GO:0007420 | 1.42E-02 | brain development                                                    |
| GO:0030707 | 1.71E-02 | ovarian follicle cell development                                    |
| GO:0007611 | 1.96E-02 | learning or memory                                                   |
| GO:0030036 | 1.96E-02 | actin cytoskeleton organization                                      |
| GO:0006357 | 1.97E-02 | regulation of transcription from RNA polymerase II promoter          |
| GO:0016055 | 1.97E-02 | Wnt receptor signaling pathway                                       |
| GO:0007269 | 2.02E-02 | neurotransmitter secretion                                           |
| GO:0006470 | 2.03E-02 | protein amino acid dephosphorylation                                 |
| GO:0006468 | 2.05E-02 | protein amino acid phosphorylation                                   |
| GO:0007242 | 2.12E-02 | intracellular signaling cascade                                      |
| GO:0007219 | 2.20E-02 | Notch signaling pathway                                              |
| GO:0035071 | 2.24E-02 | salivary gland cell autophagic cell death                            |
| GO:0007409 | 2.34E-02 | axonogenesis                                                         |
| GO:0019730 | 2.34E-02 | antimicrobial humoral response                                       |
| GO:0000381 | 2.49E-02 | regulation of alternative nuclear mRNA splicing, via spliceosome     |
| GO:0007298 | 2.68E-02 | border follicle cell migration                                       |
| GO:0008355 | 3.04E-02 | olfactory learning                                                   |
| GO:0000122 | 3.30E-02 | negative regulation of transcription from RNA polymerase II promoter |
| GO:0016319 | 3.57E-02 | mushroom body development                                            |
| GO:0007017 | 4.20E-02 | microtubule-based process                                            |
| GO:0008283 | 4.71E-02 | cell proliferation                                                   |
| GO:0006811 | 4.82E-02 | ion transport                                                        |

**Molecular Function**

| GO accession | P-value  | Description                                              |
|--------------|----------|----------------------------------------------------------|
| GO:0003700   | 1.71E-13 | transcription factor activity                            |
| GO:0005515   | 4.61E-13 | protein binding                                          |
| GO:0008270   | 2.69E-11 | zinc ion binding                                         |
| GO:0043565   | 7.85E-08 | sequence-specific DNA binding                            |
| GO:0004879   | 3.69E-06 | ligand-dependent nuclear receptor activity               |
| GO:0003704   | 5.63E-06 | specific RNA polymerase II transcription factor activity |
| GO:0005041   | 6.03E-06 | low-density lipoprotein receptor activity                |
| GO:0030528   | 8.75E-06 | transcription regulator activity                         |
| GO:0003702   | 1.03E-04 | RNA polymerase II transcription factor activity          |
| GO:0008239   | 1.91E-04 | dipeptidyl-peptidase activity                            |
| GO:0003779   | 1.91E-04 | actin binding                                            |



|            |          |                                                |
|------------|----------|------------------------------------------------|
| GO:0003707 | 3.69E-04 | steroid hormone receptor activity              |
| GO:0000166 | 4.35E-04 | nucleotide binding                             |
| GO:0016566 | 5.63E-04 | specific transcriptional repressor activity    |
| GO:0005249 | 5.95E-04 | voltage-gated potassium channel activity       |
| GO:0003729 | 6.33E-04 | mRNA binding                                   |
| GO:0004930 | 9.72E-04 | G-protein coupled receptor activity            |
| GO:0005089 | 3.13E-03 | Rho guanyl-nucleotide exchange factor activity |
| GO:0005509 | 3.30E-03 | calcium ion binding                            |
| GO:0004872 | 5.40E-03 | receptor activity                              |
| GO:0004871 | 6.59E-03 | signal transducer activity                     |
| GO:0005200 | 6.59E-03 | structural constituent of cytoskeleton         |
| GO:0004674 | 7.26E-03 | protein serine/threonine kinase activity       |
| GO:0004222 | 8.70E-03 | metalloendopeptidase activity                  |
| GO:0042803 | 8.70E-03 | protein homodimerization activity              |
| GO:0008188 | 9.50E-03 | neuropeptide receptor activity                 |
| GO:0046982 | 1.52E-02 | protein heterodimerization activity            |
| GO:0004725 | 2.36E-02 | protein tyrosine phosphatase activity          |
| GO:0005198 | 3.55E-02 | structural molecule activity                   |
| GO:0004842 | 3.66E-02 | ubiquitin-protein ligase activity              |
| GO:0051082 | 3.66E-02 | unfolded protein binding                       |
| GO:0016564 | 3.66E-02 | transcription repressor activity               |
| GO:0003676 | 4.08E-02 | nucleic acid binding                           |

---

Reported P-values are corrected for a false-discovery rate of 0.05.
