# Supplementary material for: Genomic Differentiation Between Temperate and Tropical Australian Populations ofDrosophila melanogaster
Source: Oxford University Press journal article supplement (doi:10.1534/genetics.110.123059), 2010-11-09
Supplement: tables7.pdf [file tables7.pdf]

**TABLE S7**

**The highly-differentiated circadian-regulation gene *norpA* and its known genetic-interaction partners.**

---

| FB accession | Gene         | Functional Description                                          |
|--------------|--------------|-----------------------------------------------------------------|
| FBgn0004625* | <i>norpA</i> | phospholypase C, temperature synchronization of circadian clock |
| FBgn0025680* | <i>Cry</i>   | response to light, circadian clock synchronization              |
| FBgn0003218* | <i>RdgB</i>  | required for light response                                     |
| FBgn0000121  | <i>Arr2</i>  | deactivation of rhodopsin-mediated signaling                    |
| FBgn0039774  | <i>CDase</i> | synaptic transmission                                           |
| FBgn0002524  | <i>lace</i>  | –                                                               |
| FBgn0002940* | <i>ninaE</i> | response to light                                               |
| FBgn0085373* | <i>rdgA</i>  | rhodopsin signaling pathway                                     |

---

Asterisks (\*) indicate that the gene is in the top 2.5% of 1kb  $F_{ST}$  windows.
